# Supplementary material for: Preliminary Guidelines for the Clinical Evaluation and Management of Long COVID
Source: PubMed Central journal article supplement — Infect Chemother. 2022 Jul 21;54(3):566–97. doi: 10.3947/ic.2022.0141 (PMC9533168; doi:10.3947/ic.2022.0141), 2022-07-21
Supplement: ic-54-566-s001.pdf [file ic-54-566-s001.pdf]

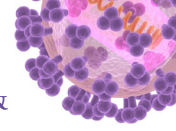

Special Article

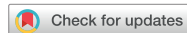

# 만성 코로나19증후군(Long COVID) 진료지침 예비 권고안

김윤정 <sup>1</sup>, 김성은 <sup>2</sup>, 김탁 <sup>3</sup>, 윤기욱 <sup>4</sup>, 이소희 <sup>5</sup>, 이은정 <sup>6</sup>, 서준원 <sup>7</sup>, 정영희 <sup>8</sup>, 정용필 <sup>9</sup>

- <sup>1</sup>경북대학교 의과대학 내과학교실 감염내과
- <sup>2</sup>전남대학교 의과대학 내과학교실 감염내과
- <sup>3</sup>순천향대학교 부속 부천병원 감염내과
- <sup>4</sup>서울대학교 의과대학 소아과학교실
- <sup>5</sup>국립중앙의료원 정신건강의학과
- <sup>6</sup>순천향대학교 부속 서울병원 감염내과
- <sup>7</sup>조선대학교 의과대학 내과학교실 감염내과
- <sup>8</sup>한양대학교 의과대학 명지병원 신경과
- <sup>9</sup>울산대학교 의과대학 서울아산병원 감염내과

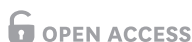

Received: Sep 13, 2022  
Accepted: Sep 19, 2022  
Published online: Sep 21, 2022

Corresponding Author:

Yong Pil Chong, MD, PhD

Department of Infectious Diseases, Asan Medical Center, University of Ulsan College of Medicine, 88 Olympic-ro-43-gil, Songpa-gu, Seoul 05505, Korea.  
Tel: +82-2-3010-3306  
Fax: +82-2-3010-6970  
Email: drchong@amc.seoul.kr  
dr.ypchong@gmail.com

Copyright © 2022 by The Korean Society of Infectious Diseases, Korean Society for Antimicrobial Therapy, and The Korean Society for AIDS

This is an Open Access article distributed under the terms of the Creative Commons Attribution Non-Commercial License (<https://creativecommons.org/licenses/by-nc/4.0/>) which permits unrestricted non-commercial use, distribution, and reproduction in any medium, provided the original work is properly cited.

ORCID iDs

- Yoonjung Kim <https://orcid.org/0000-0002-7454-4014>
- Seong Eun Kim <https://orcid.org/0000-0003-0162-6155>
- Tark Kim <https://orcid.org/0000-0002-8829-4183>
- Ki Wook Yun <https://orcid.org/0000-0002-0798-6779>

## ABSTRACT

코로나바이러스 감염증-19(코로나19) 이후 12주가 지나서도 지속되는 증상, 이른바 '만성 코로나19증후군(long COVID)'의 증가가 전 세계적으로 보고되고 있다. 만성 코로나19증후군은 다양한 형태로 나타날 수 있으며, 적절한 진단과 치료에 대한 요구가 증가하고 있다. 그러나 국제적으로 합의된 임상적 정의나 명확한 치료법이 없기 때문에 현재까지의 근거만으로 최선의 진료를 하기 어려운 점이 있다. 이에 본 지침은 최신의 근거 자료와 관련 분야 전문가들의 의견을 바탕으로 진단 및 치료에 도움을 주고자 마련되었다. 아직까지 관련 근거가 부족하기 때문에 만성 코로나19증후군 환자에게 강력하게 권고할 수 있는 검사나 약물 치료법은 없다. 이 지침은 임상적 상황에서 활용할 수 있는 만성 코로나19증후군에 대한 권고사항을 12가지 핵심 질문에 기반하여 제시하였다. 코로나19의 장기적 영향 규명과 만성 코로나19증후군에 대한 적절한 진단과 치료를 위해 지속적인 연구가 필요하다.

## 1. 배경 및 목적

2022년 6월까지 5억명 이상이 코로나바이러스 감염증-19(COVID-19, 이하 코로나19)로 확진되었고[1], 그 중 많은 사람이 코로나19 급성기 이후(일반적으로 진단 4주 후)에도 상당기간 지속되는 여러 증상을 호소한다. 흔히 이를 ‘코로나 후유증(long COVID)’라고 부르는데, 아직까지 객관적인 진단기준이 없고, 다양한 증상에 대해 어떤 검사를 시행하고 어떤 치료하는 것이 적절한 지에 대한 의학적 근거가 부족하기 때문에 개별 임상가의 경험적 판단에 의한 진료가 이루어지고 있다. 이에 대한감염학회는 관련 분야 전문가의 의학적 판단과 최신 근거에 기초한 진료지침이 필요하다고 판단하여 본 지침을 작성하였다. 흔히 코로나 후유증으로 불리는 만성 코로나19증후군(long COVID)에 대한 의학적 연구가 아직까지는 부족하기 때문에 진단과 치료에 대한 체계적 문헌 고찰은 어렵다. 그렇기 때문에 본 지침은 전통적인 근거중심지침이 아니라, 최근에 발표되는 근거와 전문가 판단에 바탕을 둔 실용적 진료지침(practical rapid guideline) 형태로 개발되었다.

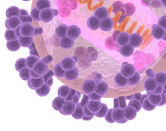

So Hee Lee   
<https://orcid.org/0000-0002-9005-3207>  
 Eunjung Lee   
<https://orcid.org/0000-0002-7724-8288>  
 Jun-Won Seo   
<https://orcid.org/0000-0002-2806-1863>  
 Young Hee Jung   
<https://orcid.org/0000-0002-8945-2200>  
 Yong Pil Chong   
<https://orcid.org/0000-0003-1672-3185>

## 2. 범위와 대상

본 진료지침은 코로나19 급성기 또는 이후에 발생하여 지속되는 증상/징후에 대한 진단적 검사와 치료에 대해 다룬다. 코로나19 급성기 치료에 대해서는 본 지침에서 다루지 않는다. 진료지침의 대상환자는 임신부와 노인을 포함한 성인 및 소아 환자이며, 지침의 사용자는 만성 코로나19증후군을 진료하는 모든 일반의 및 전문의이다.

## 3. 지침개발위원회 구성

2022년 5월 대한감염학회 주관으로 전문가를 추천 받아 진료지침 개발위원회를 구성하였다. 위원회는 감염내과, 신경과, 정신과 및 소아감염 전문가 9명으로 구성되었다.

## 4. 핵심 질문 도출

성인 및 소아에서 코로나19 후 지속되는 증상/징후의 역학, 진단적 검사, 중재 및 치료에 대한 근거 자료를 수집, 평가하고 외국의 진료지침을 검토하여 만성 코로나19증후군 관련 12개 핵심 질문을 선정하였다.

## 5. 문헌 검색 방법

2020년 이후 발행된 만성 코로나19증후군 진료지침과 관련된 문헌 검색을 수행하였다. 진료지침은 <http://www.guideline.gov>, <http://www.nice.org.uk>, <https://www.nih.gov/>, <https://www.cdc.gov/> 및 <https://www.who.int/>를 참고하였으며, PubMed ([www.pubmed.gov](http://www.pubmed.gov))에서 'long COVID', 'chronic COVID syndrome', 'post-acute COVID-19 syndrome', 'post-acute COVID syndrome', 'post COVID syndrome', 'post COVID condition', 'post COVID', 'long term COVID', 'post-acute sequelae of COVID-19' 용어의 조합으로 문헌 검색을 시행하였다. 또한 만성 코로나19증후군의 세부 증상/징후들의 진단 및 치료에 대해 'dyspnea', 'cough', 'chest pain', 'chest discomfort', 'fatigue', 'arthralgia', 'myalgia', 'headache', 'brain fog', 'smell', 'taste', 'disorder', 'dysfunction', 'neurocognitive', 'neurological', 'cognitive', 'depression', 'emotional', 'psychiatric', 'evaluation', 'assessment', 'treatment', 'therapy', 'SARS-CoV-2', 'COVID-19' 등의 단어 조합으로 원저 문헌들을 검색하여 이를 검토하였다.

## 6. 권장 사항 강도와 근거 수준

임상적으로 권고할 수 있는 수준의 근거 문헌들의 제한점으로 인하여, 권장 강도, 근거 수준은 제시하지 않으며, 임상적 근거 문헌은 부족하나 해당 치료의 이득과 위해, 근거 수준, 가치와 선호도, 자원을 고려했을 때 임상적 경험과 전문가의 합의에 따라 사용을 권고하는, 전문가 합의 권고(expert consensus)사항으로 제시하였다. 질환 정의 및 핵심 권고사항 결정은 패널 토의와 델파이 방법을 이용한 합의를 통해 이루어졌다.

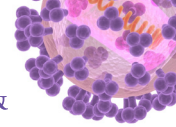

## 7. 용어 표기

본 지침에서는 의학용어집 제 6판 (대한의사협회 발행, 2020년 4월 개정)을 기준으로 관련된 학술 용어들을 한글로 표기하였으며, 한글로 의미 전달이 명확하지 않을 경우 한글로 표시한 후 괄호 내에 영문 표기를 병기하였다. 병원체 이름, 고유명사, 약품명, 단위 등과 같이 한글로 표시할 수 없는 용어들은 영문으로 표기하였다.

## 8. 지침의 제한점과 향후 과제

본 지침은 개발을 진행하고 있는 시점에서 참고할 수 있는 국내의 진료지침과 최신 문헌들을 기초로 하여 개발되었다. 향후 새로운 근거들이 축적되거나 새로운 약제가 개발되어 진단이나 치료에 중대한 변화가 있는 경우에는 지침의 개정을 고려할 수 있다.

## 9. 정의

흔히 코로나 후유증으로 불리는 만성 코로나19증후군(long COVID)에 대한 정의가 아직 명확히 정립된 것은 아니어서 여러 기관이나 지침마다 약간씩 다른 용어나 정의를 사용하고 있다. 코로나19의 다양한 증상/징후가 흔히 진단 4주 이내까지는 지속되므로 이를 급성기 코로나19라고 부른다. 세계보건기구(World Health Organization, WHO)는 코로나19 급성기나 그 이후에 발생한 증상/징후가 다른 진단으로 설명이 안되면서 2개월 이상, 진단 후 12주가 지나서도 지속되는 경우를 post-COVID-19 condition이라고 정의한다[2]. 영국 국립보건임상연구원(National Institute for Health and Clinical Excellence, NICE) 지침에서는 코로나19 급성기나 그 이후에 발생한 증상/징후가 지속되어 진단 4-12주 내에 호전되는 것을 증상 지속 코로나19(ongoing symptomatic COVID-19)라고 하고, 12주가 지나서도 지속되는 경우를 post-COVID-19 syndrome이라고 한다[3]. 유럽임상미생물감염병학회(European Society of Clinical Microbiology and Infectious Disease, ESCMID) 지침도 동일한 기간에 따른 정의를 사용하며 12주 이후까지도 지속되는 것을 long COVID라고 하였다[4]. 이와는 달리 미국 국립보건원(National Institutes of Health, NIH)은 코로나19 진단 4주 후에도 증상/징후가 지속되는 경우를 post-acute sequelae of SARS-CoV-2 infection이라 한다[5].

코로나19 발병 12주 기점으로 특정 병태생리의 변화가 있다는 근거가 불충분하지만 급성기 코로나19 이후의 후유증에 대한 연구 및 임상시험 등을 위해 용어 통일은 필요하다. 그러므로 본 지침에서는 급성기나 그 이후에 발생한 하나 이상의 증상/징후가 다른 질환으로는 설명이 안되면서 그 지속 기간이 코로나19 진단 4-12주 이내인 경우는 아급성기 코로나19(post-acute COVID-19)로, 12주가 지나서도 계속되는 것을 만성 코로나19증후군(long COVID)이라 정의한다(그림 1). 코로나19 급성기 또는 아급성기 합병증으로 정맥혈전색전증(venous thromboembolism), 심근염(myocarditis), 심낭염(pericarditis), 뇌염(encephalitis) 및 갑상선염(thyroiditis) 등이 발생할 수 있으며 이를 만성 코로나19증후군으로 분류하지는 않는다.

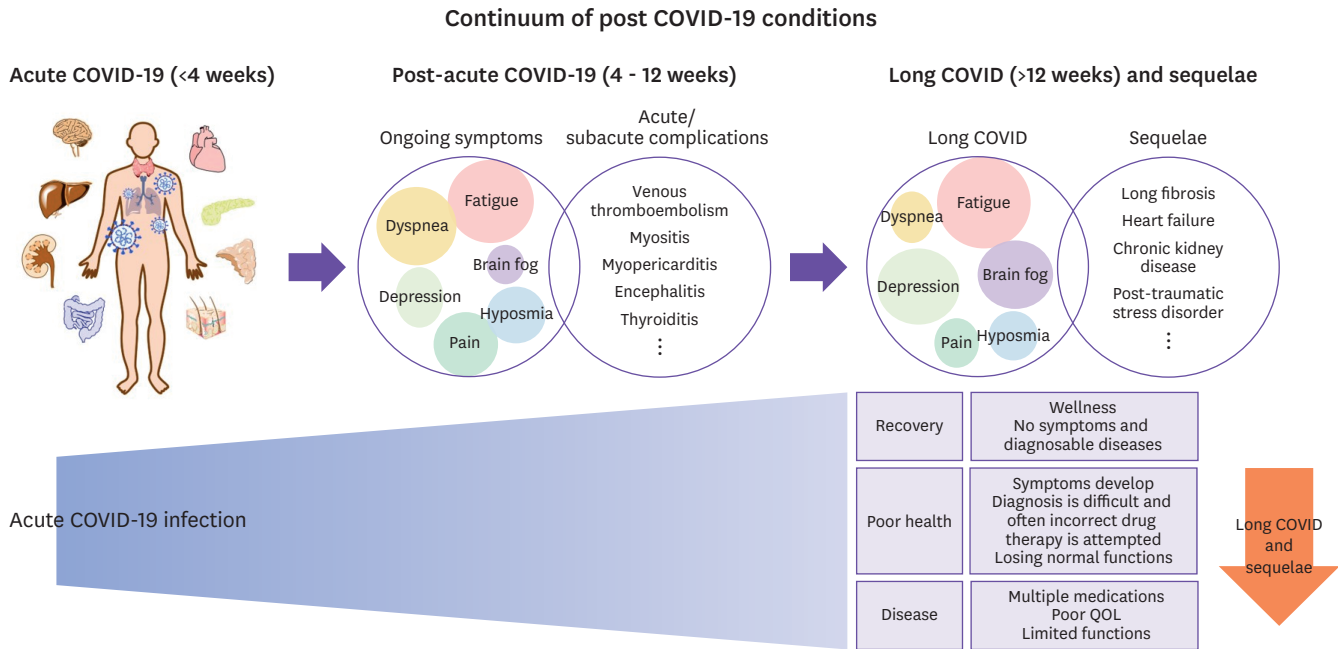

그림 1. 코로나19 이후 지속되는 증상/징후로서의 만성 코로나19증후군 개념도. QOL, quality of life.

## 10. 만성 코로나19증후군의 임상적 특징

### 주요 증상들과 빈도

만성 코로나19증후군은 코로나19 급성기 증상 회복 이후 새로 시작될 수도 있고, 급성기 증상에서 지속될 수도 있으며, 시간 경과에 따라 변동되거나 재발될 수 있다. 미국 질병통제예방센터(Centers for Disease Control and Prevention, CDC) 조사에 따르면 18-64세 코로나19 생존자 5명 중 1명, 65세 이상에서는 4명 중 1명에서 코로나19 후 관련 증상/징후가 지속되었으며, 피로감, 호흡곤란, 우울/불안, 인지저하 등 200여 개 다양한 증상들이 확인되었다[6]. 급성 코로나19 감염 후 발생 가능한 만성 코로나19증후군 증상들은 표 1과 같다.

코로나19 후 지속되는 증상/징후의 경우, 대개 시간 경과에 따라 호전을 보이며[4], 회복되는데 까지 걸리는 시간은 사람들마다 다르나, 대부분의 사람들에서 12주경에는 호전되는 것으로 알려져 있다[7]. 영국 통계청 자료에 의하면, 5명 중 1명은 5주 이상 증상이 지속될 수 있으며 10명 중 1명은 12주 이상 증상이 지속될 수 있는 것으로 알려져 있다[8]. 만성 코로나19증후군 환자들 중 57%에서 삶의 질 감소가 확인된 바 있으며[9], 코로나19 후 지속되는 증상/징후를 보인 환자들 중 66%에서 한가지 이상 장기손상이, 25%에서는 다발성 장기 손상이 동반될 수 있음이 확인되었다[10]. 국내 건강보험심사평가원 데이터를 이용한 인플루엔자 감염 환자군과 코로나19 환자군과의 비교 연구결과, 감염 급성기 이후 코로나 19 환자에서 치매, 심부전, 기분장애 및 탈모 발생률이 통계적으로 유의하게 높았다[4].

6개월까지 지속되는 가장 흔한 만성 코로나19증후군 증상으로는 피로감, 운동 후 권태감, 인지기능장애 등이 알려져 있으며[11], 국내 대구지역 환자 대상 온라인 설문조사 연구에서 코로나19 급성 감염 6개월 후, 66%의 환자가 피로감, 집중력 저하, 기억력 저하, 인지기능장애,

표 1. 만성 코로나19증후군의 전체 및 시기별 증상 발생 빈도[12, 13, 15]

| 증상                                | 메타분석 <sup>a</sup> , % (95% CI) | 국내 (241명 대상) |           |
|-----------------------------------|--------------------------------|--------------|-----------|
|                                   |                                | 6개월 후, %     | 12개월 후, % |
| <b>일반적(Systemic)</b>              |                                |              |           |
| 발열(Fever)                         | 1.1 (0.2 - 4.7)                | 1.2          | 0         |
| 피로감(Fatigue)                      | 31.0 (23.9 - 39.0)             | 25.3         | 16.2      |
| 어지럼증(Dizziness)                   | 4.5 (2.5 - 7.9)                | 14.9         | 10.4      |
| <b>순환기/호흡기계(Cardiopulmonary)</b>  |                                |              |           |
| 기침(Cough)                         | 8.2 (4.9 - 13.4)               | 8.7          | 7.1       |
| 가래(Sputum)                        | 5.5 (3.2 - 9.2)                | 8.7          | 7.1       |
| 인후통(Sore throat)                  | 4.7 (2.4 - 8.9)                | 12           | 7.1       |
| 호흡곤란(Dyspnea)                     | 25.1 (17.9 - 34.0)             | 5.4          | 2.9       |
| 가슴통증(Chest pain/chest discomfort) | 6.4 (3.2 - 12.4)               | 8.3          | 4.6       |
| 두근거림(Palpitation)                 | 9.7 (6.0 - 15.3)               | 2.5          | 2.5       |
| <b>소화기계(Gastrointestinal)</b>     |                                |              |           |
| 식욕부진(Anorexia)                    | 17.5 (4.1 - 51.0)              | 5.4          | 2.9       |
| 오심/구역(Nausea/vomiting)            | 6.7 (1.6 - 23.6)               | 6.2          | 0.8       |
| 복부 불편감(Abdominal discomfort)      | 18.0 (11.5 - 26.1)             | 8.7          | 5         |
| <b>신경과적(Neurological)</b>         |                                |              |           |
| 두통(Headache)                      | 4.9 (2.3 - 10.1)               | 12.4         | 4.6       |
| 경련(Seizures/cramps)               | 1.3 (0.5 - 2.9)                | 0.4          | 0         |
| 미각이상(Taste disturbance)           | 13.5 (9.0 - 19.9)              | 6.6          | 3.3       |
| 후각이상(Smell disturbance)           | 15.2 (10.8 - 21.0)             | 8.7          | 6.2       |
| 이상감각(Tingling/paresthesia)        | 9.1 (2.2 - 30.9)               | 11.2         | 10        |
| <b>신경인지적(Neurocognitive)</b>      |                                |              |           |
| 집중력저하(Concentration impairment)   | 26.0 (21.0 - 31.7)             | 25.3         | 22.4      |
| 기억력저하(Memory impairment)          | 17.9 (5.3 - 46.3)              | 25.7         | 19.9      |
| 인지장애(Other cognitive impairment)  | 17.8 (0.1 - 98.2)              | 25.3         | 21.2      |
| <b>정신과적(Psychological)</b>        |                                |              |           |
| 우울감(Depression)                   | 8.1 (4.1 - 15.1)               | 24.9         | 17.8      |
| 불안증(Anxiety)                      | 18.7 (9.0 - 35.3)              | 24.1         | 16.2      |
| 수면장애(불면증)(Sleep disorder)         | 18.2 (9.6 - 31.6)              | 21.2         | 13.3      |
| 외상 후 스트레스 장애(PTSD)                | 9.1 (3.7 - 21.0)               | 7.9          | 5         |
| <b>근골격계(Musculoskeletal)</b>      |                                |              |           |
| 근육통(Muscle pain/myalgia)          | 11.3 (6.2 - 19.8)              | 6.2          | 1.7       |
| 관절통(Joint pain/arthralgia)        | 9.4 (5.7 - 15.0)               | 11.2         | 6.6       |
| <b>기타</b>                         |                                |              |           |
| 탈모(Hair loss)                     | 14.3 (5.3 - 33.2)              | 17           | 14.9      |
| 피부발진(Skin rash)                   | 2.8 (1.0 - 8.2)                | 10.8         | 6.6       |

<sup>a</sup>메타분석은 12개 국가에서 총 10,951명의, 증상 발현일로부터 12주 이상, 코로나19 확진 또는 임상적 코로나19 의심 환자들을 대상으로 시행됨. CI, 95% confidence interval; PTSD, post-traumatic stress disorder.

불안, 우울, 탈모, 어지럼증, 두통, 브레인 포그(brain fog), 후각상실, 미각상실, 호흡곤란 등 순으로 다양한 임상 증상을 호소함을 확인하였다[12]. 브레인 포그란 머리에 안개가 낀 것처럼 멍한 느낌이 지속되어 생각과 표현을 분명하게 하지 못하는 상태를 의미한다. 동일한 환자군들을 대상으로 시행된 코로나19 진단 1년 후 설문조사 연구에서, 전체 환자 241명 중 127명(53%)의 환자에서 만성 코로나19증후군 증상이 지속되며, 집중력 저하, 인지기능장애, 기억력 저하, 우울, 피로감, 불안 등 순으로 지속 빈도가 높은 것을 확인하였다. 특히 신경, 정신과적 증상들이 장기간 지속되는 것으로 확인되었으며, 각 만성 코로나19증후군의 증상 지속 빈도는 시간 경과에 따라 감소 양상을 보였다[13]. 다른 국내 대구지역 상급병원에서 시행된 전향적 설문조사 연구 결과, 코로나19 진단 1년 후에도 기억력 저하(24%), 불면증(15%), 피로감(14%), 불안(13%) 순으로 다양한 임상 증상이 지속되는 것으로 확인되었다[14]. 만성 코로나19증후군의 전체 및 시기별 증상 발생 빈도는 표 1과 같다[12, 13, 15].

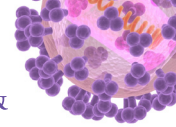

코로나19 후 증상/징후 지속은 급성기의 중증도와 관련 없이 발생할 수 있으며, 만성 코로나19증후군은 입원 치료를 받았던 환자에서 입원하지 않았던 환자에서 보다 높은 발생률을 보였다[4].

**만성 코로나19증후군의 위험인자**

만성 코로나19증후군의 발생과 연관된 위험인자로는 인구학적 요인(성별, 나이 등), 비만도, 기저질환, 입원환자, 중증환자, 베타2 작용제(beta2-agonist)사용군, 백신 미접종군 등이 알려져 있으나[4, 13, 16-20], 연구에 따라 이들 위험인자의 연관성은 만성 코로나19증후군 각 증상에 따라 다양하게 나타나고 있다. 만성 코로나19증후군 관련 두 가지 일관된 위험인자로는 성별과 코로나19 급성기의 중증도가 있으며, 여성의 경우 남성보다 만성 코로나19증후군 발생 위험성이 2배 더 높은 것으로 알려져 있다[4]. 국내 연구에서도 여성의 경우, 신경 정신과적 만성 코로나19증후군 발생 위험성이 높은 것으로 확인된 바 있다[12]. 중증 코로나19는 특히 피로감과 강한 연관성을 보이는 것으로 알려져 있다[4]. 일부 연구에서는 젊은 연령에서 만성 코로나19증후군 발생 위험도가 더 높았으며, 인종 간의 차이는 없었다는 보고가 있다[21].

**11. 핵심질문**

**핵심질문 1) 어떤 경우에 만성 코로나19증후군을 의심해야 하는가?**

| 권고안                                                                                                                                                                                                                                                                                                                                                                                                               |
|-------------------------------------------------------------------------------------------------------------------------------------------------------------------------------------------------------------------------------------------------------------------------------------------------------------------------------------------------------------------------------------------------------------------|
| <ul style="list-style-type: none"> <li>• 코로나19진단 이후 12주 이후에도 지속되는 증상이 있는 환자들은 만성 코로나19증후군 가능성에 대한 평가를 받아야한다.</li> <li>• 환자의 증상이 기저질환, 코로나19의 합병증(예, 혈전색전증, 심막염, 뇌염 등) 혹은 해당 증상을 보일 수 있는 다른 질환 (예, 알레르기비염, 천식, 부신 기능저하증, 종양 등)에 의하여 발생하였을 가능성을 먼저 배제해야 하며, 가능성이 높은 질환에 대한 검사가 시행되어야 한다.</li> <li>• 기저질환, 코로나19 합병증, 해당 증상이 발현될 수 있는 다른 질환이 배제되고 코로나19 진단 12주가 지나서도 지속되는 증상이 존재하는 경우 만성 코로나19증후군으로 진단한다.</li> </ul> |

만성 코로나19증후군은 배제진단으로, 이에 대한 진단적 접근은 코로나19 합병증과 코로나19와 관련이 없는 다른 질환들을 배제하는 것으로 시작한다.

**가. 코로나19 합병증 여부에 대한 평가**

**(1) 심폐 후유증(Cardiopulmonary sequelae)**

코로나19는 입원이 필요한 중증 환자에서 급성기 폐/심장 손상으로 인해 심폐후유증 (cardiopulmonary sequelae)을 유발할 수 있고, 이는 지속되는 증상(피로, 호흡곤란, 흉통, 기침 등) 및 검사 항목들의 이상소견으로 이어질 수 있다. 여러 연구에서 상당한 비율의 환자가 감염 1개월 후 호흡 기능(54%) 및 흉부 컴퓨터단층촬영 연구(40-94%)에서 비정상 소견을 보였고 [22-24], 3개월 째에는 26% (중환자실 입원환자들 중에는 50%)에서 폐 섬유화가 관찰되었다 [25]. 또한 급성기 코로나19와 연관되어 흉막 비후는 27%, 흉수는 5-6%에서 확인된다[26, 27]. 따라서 이러한 폐 후유증으로 인하여 증상이 지속되는 것인지 감별이 필요하다. 코로나19 환자의 심근염(myocarditis)은 주로 첫 2주 동안 발생하지만, 감염이 해결된 후 수 주안에 나타



나는 증례보고도 있다[28]. 또한 코로나19 환자의 5%에서 심낭 삼출(pericardial effusion)이 보고되었으며, 이는 심근염이 있는 환자에서 주로 발생하였다. 입원 환자의 1%에서 심장 압전(cardiac tamponade)도 보고되었다[26]. 따라서 환자의 지속되는 증상이 이러한 심장, 폐 합병증으로 인한 것일 가능성에 대한 고려가 필요하다.

### (2) 코로나19 관련 응고병증(COVID-19-associated coagulopathy)

일부 코로나19 환자들에서 혈전증이 발생할 수 있다. 코로나19 환자가 퇴원한 후 혈전증 발생은 보통 0.5-2.5%로 추정된다[29, 30]. 코로나19 관련 혈전색전증은 심부정맥 혈전증(deep vein thrombosis) 및 폐 색전증(pulmonary embolism)을 포함하는 정맥 혈전증과 뇌졸중 및 심근경색을 포함한 동맥 혈전증의 다양한 형태로 나타나며 중환자실에 입원한 위중증 코로나19 환자의 최대 3분의 1 정도까지 확인된다[31]. 코로나19 관련 합병증으로 혈전색전증이 존재하는 경우 증상이 다양한 형태로 나타날 수 있어, 장기간 지속되는 증상을 호소하는 코로나19 환자에서 합병증으로 혈전색전이 발생했을 가능성에 대한 고려가 필요하다.

### (3) 내분비계 합병증(Endocrine complications)

코로나19는 여러 내분비 및 대사 질환을 유발할 수 있고, 이 역시도 코로나19가 호전된 이후에도 지속적인 이상소견을 보일 수 있다[32]. 이 중 부신에 대한 코로나19 바이러스 자체의 직접적인 영향 혹은 코로나19 급성기 동안 치료 목적의 글루코코르티코이드 투여로 인한 의인성 원인으로 부신기능저하증의 발생이 가능하다[33, 34]. 또한 명확한 위험인자 없이 새롭게 진단되는 당뇨병 역시 코로나19와 연관된 질환으로 보고되고 있다[35]. 이 밖에도 비타민 D 결핍, 저칼슘혈증 및 척추 골절 역시 코로나19와 연관된 내분비계 후유증으로 발생할 수 있고[36, 37], 갑상샘 질환 역시 발생 가능하다[38, 39]. 따라서 시상하부-뇌하수체-부신 축 억제, 골 대사 이상, 갑상샘 기능 이상이 의심되는 경우 적절한 평가가 이루어져야 하고, 이는 기존의 해당 질환 진료지침에 따라 평가하는 것이 바람직하다.

### (4) 뇌신경계 합병증(Neurological complications)

급성 코로나19후 뇌신경계 합병증 및 후유증 발생에 대한 연구결과들이 보고되고 있으며, 특히 급성 코로나19 중증상태에서 위험도가 높아지는 것으로 알려져 있다[40, 41]. 따라서 급성 코로나19 후 신경학적 이상소견을 보이는 경우 이에 대한 적절한 신경학적 평가가 필요하다.

### (5) 코로나19후 면역반응(Post-Covid-19 immune-mediated manifestations)

코로나19 환자에서 면역 매개 현상의 질환이 발생할 수 있고, 이는 드물지만 자가면역과 연관되어 있으며, 관절염(arthritis), 근염(myositis), 췌장염(pancreatitis), 피부증상(periostitis), 신경질환(encephalitis, Guillain-Barré syndrome, myelitis), 신장질환(tubulopathies, glomerulonephritis), 혈액질환(idiopathic thrombocytopenic purpura, autoimmune hemolytic anemia), 내분비질환(thyroiditis, thyrotoxicosis), 전신자가면역질환(lupus, vasculitis, sarcoidosis 등) 등이 보고되었다[28]. 이러한 코로나19 후 면역 관련 질환으로 인하여 증상이 지속되는 것일 가능성에 대한 고려가 필요하다.

### 나. 코로나19와 관련 없는 질환에 대한 평가

코로나19의 합병증 이외에도, 해당 증상을 보일 수 있는 기저질환의 악화 또는 코로나19와 무관한 다른 질환들에 대한 평가 역시 필요하다. 표 2에 나열된 질환들을 포함하여[7, 42] 다양

표 2. 코로나19 감염 이후 발생 가능한 질환들[7]

| 분류   | 전신 질환                                                                                                                                                                                                                |
|------|----------------------------------------------------------------------------------------------------------------------------------------------------------------------------------------------------------------------|
| 순환기계 | Myocarditis, pericarditis, microvascular angina, cardiac arrhythmias (atrial flutter, atrial fibrillation), dysautonomia (postural orthostatic tachycardia syndrome)                                                 |
| 호흡기계 | Interstitial lung disease, pulmonary emboli                                                                                                                                                                          |
| 소화기계 | Hepatitis, abnormal liver enzymes, pancreatitis                                                                                                                                                                      |
| 내분비계 | New-onset diabetes (diabetic ketoacidosis, etc), thyroiditis (subacute thyroiditis, Graves' disease, Hashimoto thyroiditis, etc), adrenal insufficiency                                                              |
| 신경계  | Cerebral venous thrombosis, myelopathy, neuropathy, neurocognitive disorders, dysphonia, encephalitis, Guillain-Barré syndrome                                                                                       |
| 근골격계 | Arthritis, myositis                                                                                                                                                                                                  |
| 기타   | Renal impairment (tubulopathies, glomerulonephritis)<br>Autoimmune diseases (systemic lupus erythematosus, vasculitis, sarcoidosis)<br>Mast cell activation syndrome<br>New-onset allergies/anaphylaxis<br>Perniosis |

한 호흡기, 심혈관, 혈액, 내분비, 알레르기, 신경·정신계 질환에 해당하는 여러 증상들이 단독 또는 복합적으로 보일 수 있음을 고려하여 이러한 질환들에 대해 적절한 실험실적/영상 의학적 평가가 필요하다.

**핵심질문2) 만성 코로나19증후군 환자에서 증상에 따라 어떤 검사가 시행되어야 하는가?**

**권고안**

- 만성 코로나19증후군 진단을 위한 특이적인 검사법은 없다.
- 배제 진단을 위한 목적으로 환자가 호소하는 증상 및 징후를 설명할 수 있는 질환을 고려하여 관련 혈액검사를 실시한다.

**1. 호흡곤란**

- 폐기능검사는 간단하고 비침습적인 검사로 증상과 관계 없이 중증 또는 위중증 코로나19 환자나, 급성기 코로나19 후 지속적으로 호흡곤란이 있거나, 기저 폐질환이 있는 환자에게 코로나19 진단 후 3개월째 폐확산능을 포함한 폐기능검사의 시행을 고려할 수 있다.
- 흉부 엑스레이는 3개월간 호흡기 증상 지속 시 다른 질환의 감별과 초기 폐섬유화의 발견을 위해 시행하고, 흉부 엑스레이에 이상이 있거나 이상이 없더라도 증상 지속 시 흉부 컴퓨터단층촬영을 고려할 수 있다.

**2. 기침**

- 기침이 3개월 이상 지속 시에는 폐 실질의 섬유화나 기관지 염증을 확인하기 위해 흉부 엑스레이와 흉부 컴퓨터단층촬영을 고려할 수 있다.

**3. 가슴통증**

- 코로나19 진단 후 급성기(4주 이내)부터 심낭 또는 심근손상을 시사하는 증상(가슴통증, 두근거림, 호흡곤란)이 12주 이상 지속되는 환자에게는, 심낭염/심근염, 심낭전 등의 합병증을 평가할 목적으로 경흉부심초음파 검사를 고려할 수 있다.
- 환자평가/재활치료 시작 시 심기능평가검사로 6분 보행검사(6 minute walking test) 또는 일어서기 동작검사(15-30 second sit to stand test)의 시행을 고려하여 볼 수 있다.

(continued to the next page)



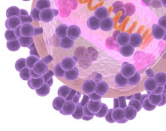

**3. (Continued) 가슴통증**

- 코로나19 급성기에는 존재하지 않았던 가슴통증이 12주 이후 만성적으로 존재하는 환자에게 특정 심장영상검사(심초음파, 컴퓨터단층촬영 등)나 심기능평가검사(6분 보행검사 또는 일어서기 동작검사)를 권고하거나 제한할 근거가 부족하다.

**4. 피로감**

- 코로나19 이후 12주 이상 지속되는 피로 증상을 평가하는 특이적 검사법은 없다.
- 피로 증상 척도(fatigue severity scale)를 이용하여 피로 정도를 측정할 수 있다.
- 구체적인 병력 확인을 통해, 피로 증상을 설명할 수 있는 기저질환, 코로나19 합병증 및 코로나19와 무관한 다른 기타 질환에 대해 감별한다.
- 피로를 설명할 수 있는 기질적 원인이 밝혀지지 않는다면, 코로나19 연관 만성피로증후군
- 가능성을 고려한다.

**5. 관절통 및 근육통**

- 만성 코로나19증후군으로 관절통, 근육통 증상이 지속되는 환자에게서 특정 검사(creatine kinase, lactate dehydrogenase, C-reactive protein, rheumatoid factor, anti-nuclear antibody, 영상의학검사)를 권고하거나 제한할 근거가 부족하다.

**6. 두통**

- 만성 코로나19증후군 관련한 두통의 평가를 위해 병력청취, 신경학적 진찰, 활력징후 등이 포함되어야 한다.
- 기질적 원인의 감별이 필요한 경우에는 뇌 영상의학검사의 시행을 고려해야 하며, 전문적 평가와 치료를 위해 신경과 전문의에게 의뢰한다.

**7. 인지증상**

- 만성 코로나19증후군 관련한 인지증상에 대해 뇌 영상의학검사를 권고할 근거는 부족하나, 다른 원인의 감별이 필요하거나, 연구목적으로는 뇌 영상의학검사를 고려할 수 있다. 또한 인지증상으로 인해 직업적, 사회적 기능 저하가 있는 경우 신경심리검사를 고려할 수 있다.

**8. 심리적/정신적 증상**

- 진료 의사는 코로나19의 심리적 후유증이 실질적으로 존재한다는 것을 알고 있어야 하고, 정신사회학적 평가를 시행할 수 있으며 필요시 전문적 평가와 치료를 위하여 정신건강의학과 전문의에게 의뢰한다.
- 심각한 정신과적 증상이 있거나 자해 혹은 자살 위험이 있으면 신속하게 정신건강의학과 전문의에게 진료를 의뢰한다.
- 정신과적 증상에 대해 뇌 영상의학검사를 권고할 근거는 부족하다. 다만 다른 기질적 원인을 배제하기 위해서 혹은 연구 목적으로는 시행할 수 있다.
- 기존 정신질환자가 만성 코로나19증후군에 해당하는 다른 기관과 관련된 증상(예, 호흡기 증상)을 호소할 때 진단 및 처치에 있어 비 정신질환자와 차별 받아서는 안된다.

**1) 배제 진단을 위해 필요한 혈액검사**

만성 코로나19증후군 환자에게 일상적인 혈액검사의 유용성을 평가한 연구는 없다. 최근 한 연구에 따르면, 코로나19 진단 12개월 후 추적 평가 결과 실험실적 검사에서 이상소견을 보

이는 환자는 약 1.5% 정도로 매우 적었다[43]. 그럼에도 불구하고 증상에 따른 혈액검사는 다른 질환을 배제하기 위한 목적으로 시행되어야 하고, 그 결과는 코로나19 이후 지속적인 이상소견의 결과는 아닌지 해석에 주의하여야 한다. 여러 지침에서 권고하는 바와 같이 증상에 따라 다음과 같은 혈액검사를 고려할 수 있다[4, 44, 45]. C-반응 단백(C-reactive protein, CRP), 적혈구침강속도(erythrocyte sedimentation rate, ESR), 전혈구검사(complete blood count, CBC), 간기능 검사(liver function test, LFT)와 함께 심장 관련 증상이 있는 환자에게는 심근효소검사(troponin, creatinine kinase-myoglobin binding [CK-MB]) 및 뇌나트륨이뇨펩타이드 검사(B-type natriuretic peptide, BNP)를 고려하고, 임상적으로 의심되는 경우 갑상선염(thyroiditis)을 배제하기 위해 갑상선 기능검사(thyroid function test, TFT)를 시행한다. 산소포화도가 감소된 환자의 경우 동맥혈 가스분석을 시행하며, d-dimer는 호흡기 증상이 없는 환자에게 검사를 시행하는 것은 추천하지 않는다. 당뇨의 위험이 높거나 공복혈당 장애가 있는 환자들은 공복혈당 및 당화혈색소 수치를 확인해야 한다.

## 2) 호흡곤란

급성 코로나19 이후 4-12주 이상 호흡곤란이 지속 시 진단적 검사가 필요할 수 있다. 일부 진료 지침에서 변형된 Medical Research Council 호흡곤란 척도(modified Medical Research Council [mMRC] dyspnea scale)를 이용해 호흡곤란의 정도를 평가하도록 추천하나 코로나19 후 지속되는 호흡곤란 진단에 대한 기준이 아직 없어 추가 연구가 필요하다[44]. 회복기 코로나19 환자에서 호흡기 기능 이상이 다양한 비율로 보고가 되는데, 이는 호흡기 기능 이상의 정의, 추적 기간, 급성 코로나19 당시의 중증도, 기계호흡 치료 유무, 기저 호흡기능에 따라 다르다[46].

가장 흔한 폐기능검사(pulmonary function test) 이상은 폐확산능(diffusion capacity for carbon monoxide, DLCO)이며, 강제폐활량(forced vital capacity, FVC)과 총폐용량(total lung capacity, TLC)을 포함한 폐기능검사 시행 시 제한성 장애가 가장 흔하다. 중환자실 입원 치료를 받았던 위중증 코로나19 환자들 중 최대 80%에서까지 퇴원시 DLCO 손상(예측치의 80% 미만)이 확인되었고, 이들 환자들 중 50-70%에서는 퇴원 3-6개월 후에도 DLCO 손상이 확인되었다. DLCO의 감소는 입원 시의 흉부 컴퓨터단층촬영 중증도 점수 총합이(computed tomography severity score, 5개의 폐엽의 침범 정도에 따라 5단계로 정함) 높은 것과 급성호흡곤란증후군(acute respiratory distress syndrome, ARDS)과 연관이 있었다[46]. 일부 환자들은 급성기 이후 6개월째 DLCO가 중증 환자에서 29% 감소, 위중증 환자에서 58%가 감소되어 있었다[47]. 중증 코로나19 후 1년째 추적한 연구에서 환자들의 23-54%에서 DLCO가 80% 미만이었으며, TLC는 예측치의 80% 미만인 위중증 환자에서 6개월째 39%, 12개월째 29%로 관찰되었다[43]. 경증이나 준중증 코로나19 환자들에 대한 폐기능검사 연구자료는 거의 없으며, 여러 연구들에서 중증 환자들의 대조군으로 이들이 포함되었고, 10-20% 환자에서 DLCO를 포함하는 폐기능검사에 이상이 있었던 것으로 보고되었다[4, 25, 47].

두 개의 관찰연구에서 급성 코로나19 이후 6-8주경 흉부 엑스레이 결과를 확인하였는데, 추적한 흉부 엑스레이 소견이 급성기 코로나19의 중증도와는 상관관계가 있었으나 지속되는 호흡기 증상 여부 및 증상 회복 정도와는 상관관계가 없었다[48, 49]. 코로나19로 입원치료 받은 110명을 퇴원 후 8-12주 동안 추적하였을 때 14%의 환자에서 흉부 엑스레이에 이상이 있었다. 망상음영(reticular opacities)이 흉부 엑스레이 이상 소견 환자의 53%에서 변연부 무기폐(peripheral atelectasis)는 33%에서 관찰되었다[50].

중증 또는 위중증 코로나19 환자에서 진단 3개월 후 흉부 컴퓨터단층촬영 시행 시 간유리음영(ground glass opacities, GGOs), 경결(consolidation) 또는 섬유화 변화(fibrotic change)가 60-75%에서 관찰되었다[51]. 중증도와 상관없이 코로나19 진단 3-6개월 뒤 흉부 컴퓨터단층촬영 소견에 대한 연구들을 대상으로 체계적인 문헌고찰을 시행했을 때 59%의 환자에서 이상 소견이 있었고 간유리음영이 39%로 가장 흔했고 섬유화와 망상음영이 30%였다[52]. 그러나 이러한 이상 소견이 향후의 폐손상을 예측할 수 있는지는 알려져 있지 않다. 한 연구에서 코로나19 회복 후 2-3개월 째 53명 환자를 대상으로 흉부 자기공명영상을 시행하였는데 60%에서 폐실질에 이상이 있었지만 임상적으로 지속되는 증상과는 관련이 없었다[53].

급성 코로나19 이후 4-12주 이상 호흡곤란이 지속될 경우, 흉부 엑스레이와 흉부 컴퓨터단층촬영 소견이 증상과 상관관계가 부족하고 미래의 폐손상을 예측하기 어렵더라도 다른 질환의 감별을 위해 흉부 영상의학검사가 필요할 수 있겠다.

### 3) 기침

급성기 코로나19 이후 지속되는 기침은 대개 만성 피로와 호흡곤란과 연관이 있다. 폐의 섬유화가 기침 반사의 민감성을 증가시키므로 기침이 지속된다면 다른 폐 질환을 감별해야 하고 폐실질의 섬유화나 기관지 손상 여부 확인이 중요하다. 폐실질의 섬유화와 기관지 손상은 흉부 컴퓨터단층촬영으로 확인 가능하다. 만성 기침의 흔한 원인인 위식도 역류질환(gastroesophageal reflux disease)이나 엔지오텐신 전환효소 억제제(angiotensin converting enzyme inhibitor, ACE inhibitor) 사용 여부의 확인이 필요하다[54].

### 4) 가슴통증

코로나19 이후 심낭염, 심근염, 심부전, 부정맥이 확인된 보고가 있으나 해당 심장질환이 코로나19에 의하여 발생하였다는 인과관계가 항상 성립되는 것은 아니다. 한 연구에서는 급성 코로나19 2개월 이후에도 가슴통증, 두근거림, 호흡곤란, 부종 등의 증상이 존재하는 환자 중 28% (14/51명)에서는 중증의 심혈관계 질환이 존재하는 것으로 보고한 바 있다[55]. 그러나 이 빈도는 중증 합병증 환자의 선택편향에 따라 과도하게 추정된 결과일 가능성이 있으며, 다른 연구에서는 경증-중등증의 코로나19 환자에서 감염 3개월 이후 시행된 경흉부심초음파 결과 25%에서 (38/150명) 이상 소견을 보였으며, 대부분의 경우 좌심실박출률의 감소, 폐동맥압 상승, 이완기 기능부전, 심낭비후 소견에 해당하였다[56]. 또 다른 경흉부심초음파 연구에서도 무증상 코로나19 환자 대상으로 진단 후 30-100일에 시행된 심초음파에서 좌심실 긴장(strain), 이완기 기능부전, 폐동맥 고혈압 등의 소견이 상당수의 환자에서 확인된 바 있다[57, 58]. 이러한 심장관련 합병증의 빈도를 고려할 때, 급성기 코로나19 시기부터 심장 합병증(심근염, 심낭염, 심부전)이 확인되었던 환자에게는 2-3개월 내에 경흉부심초음파 추적관찰을 하는 것이 적절하다. 또한 급성기부터 가슴통증, 두근거림, 호흡곤란 증상이 지속되었으나 적절한 심장 합병증의 진단검사가 시행되지 않은 환자에게는 심장관련 합병증의 빈도를 고려할 때 경흉부심초음파 검사를 고려하여 볼 수 있다.

심장 자기공명영상의 경우 코로나19 진단 1-4개월 이후 19-71%에서 이상소견이 확인되는 것으로 보고되었으나[53, 59, 60], 이러한 이상소견들이 증상과 관련이 없거나, 진단 6개월 이후 소실되는 것임을 보여주는 연구결과가 있다[61]. 따라서 심장 자기공명영상의 경우 각각 개별의 환자의 증상과 임상 상황에 따라 시행 필요성이 판단되어야 한다.

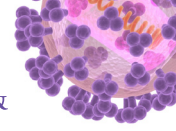

감염 후 쇠약 및 신체기능 저하를 평가하는 방법으로 6분 보행검사 전 후의 산소포화도를 측정하는 방법, 일어서기 동작검사(통상 15-30초 간 앉았다 일어나는 횟수 측정), 간편신체기능검사(short physical performance battery, 균형검사, 보행속도 검사, 의자 일어서기 5회 반복검사가 포함됨)를 고려하여 볼 수 있다[4]. 이러한 평가방법을 통하여 만성 코로나19증후군 환자들을 평가하였을 때 대부분의 연구에서 급성기의 질환 중증도가 높았던 경우일수록 심한 기능장애와의 연관성이 확인되었다[25, 47]. 따라서 만성 코로나19증후군 중 호흡곤란과 가슴통증 증상이 존재하는 환자에서 재활을 고려할 때 심장기능 장애여부를 먼저 평가하는 것을 고려할 수 있다.

국내연구에 따르면 코로나19 후 가슴통증은 6개월 후 13%, 12개월 후 7%에서 존재하는 것으로 보고하고 있으며[13], 외국 메타분석 연구에서는 코로나19 진단 3-6개월 이후에 6% (95% 신뢰구간, 3.2-12.4)로 보고되어[15], 시간이 지날수록 급성기에 존재하였던 가슴통증의 반도는 감소하는 추세를 보인다. 따라서 가슴통증 증상이 코로나19 진단 12주 이후 새롭게 발생한 경우 만성 코로나19증후군 이외의 다른 질환 때문일 가능성에 대한 고려가 필요하며, 필요시 다른 심질환을 진단/배제할 목적의 심장 영상의학검사를 시행할 수 있다. 그러나 만성 코로나19증후군에서 보이는 특징적인 심장 영상의학검사 소견은 현재까지 알려진 바 없어, 다른 질환을 진단하거나 또는 배제하기 위한 목적이 아닌 만성 코로나19증후군의 진단을 위해 심장 영상의학검사를 권고하거나 제한할 근거는 부족하다.

**5) 피로감**

피로는 코로나19 환자들의 흔한 호흡기 외 증상 중 하나로, 보통 41% 정도에서 호소하며[45], 감염 후 4주 째에 35-45% [62, 63], 8주째에 30-77% [64-66], 12주 째에 16-55%에서 나타난다 [22, 67]. 코로나19 환자들의 피로는 중동호흡기증후군(Middle East respiratory syndrome, MERS)이나 중증급성호흡증후군(severe acuter respiratory syndrome, SARS), 지역사회획득폐렴 이후에 설명되는 만성피로증후군(chronic fatigue syndrome)과 유사한 특징을 가진다[68, 69]. 피로는 정의가 어렵고, 일반적으로 비특이적이고, 주관적인 특성을 가지는 증상으로 객관적 평가가 어려운 증상이다. 피로감을 호소하는 환자들에게 피로의 정도를 평가하기 위해 피로 증상 척도(fatigue severity scale, FSS)를 적용해볼 수 있다(표 3). FSS는 총 9개의 문항으로 구성되어 있고, 지난 1주일 동안의 피로정도를 17점으로 평가하여 각 문항의 점수를 합한 뒤, 9로 나눈 평균값을 최종 FSS 점수로 정하고, 이들 점수가 높을수록 피로도가 높은 것으로 평가할 수 있다. 이 평가법은 3.22점을 판정기준치(cut-off value)로 선정할 때 84%의 민감도, 86%의 특이도를 보여준다[70].

**표 3. 피로 증상 척도(Fatigue severity scale)**

| 설문 내용                                         | 전혀 그렇지 않다 |   |   |   |   | 매우 그렇다 |   |  |
|-----------------------------------------------|-----------|---|---|---|---|--------|---|--|
| 1 피로하면 의욕이 없어진다.                              | 1         | 2 | 3 | 4 | 5 | 6      | 7 |  |
| 2 운동을 하면 피로해진다.                               | 1         | 2 | 3 | 4 | 5 | 6      | 7 |  |
| 3 쉽게 피로해진다.                                   | 1         | 2 | 3 | 4 | 5 | 6      | 7 |  |
| 4 피로 때문에 신체활동이 감소된다.                          | 1         | 2 | 3 | 4 | 5 | 6      | 7 |  |
| 5 피로로 인해 종종 문제가 생긴다.                          | 1         | 2 | 3 | 4 | 5 | 6      | 7 |  |
| 6 피로 때문에 지속적인 신체활동이 어렵다.                      | 1         | 2 | 3 | 4 | 5 | 6      | 7 |  |
| 7 피로 때문에 업무나 책임을 다 하지 못한다.                    | 1         | 2 | 3 | 4 | 5 | 6      | 7 |  |
| 8 내가 겪고 있는 가장 힘든 문제를 세 가지 뽑는다면 그 중에 피로가 포함된다. | 1         | 2 | 3 | 4 | 5 | 6      | 7 |  |
| 9 피로 때문에 직장, 가정, 사회활동에 지장을 받는다.               | 1         | 2 | 3 | 4 | 5 | 6      | 7 |  |



**표 4. 만성 피로 증후군(Chronic fatigue syndrome) 진단 관련 평가 기준 항목[45]**

|                                                   |
|---------------------------------------------------|
| 만성 피로 증후군 평가 항목                                   |
| · 두통                                              |
| · 근육통                                             |
| · 수면장애                                            |
| · 삼킴통증(연하통)                                       |
| · 비염증성 다발성 관절통                                    |
| · 최근 집중·주의 결핍, 기억 장애                              |
| · 통증을 동반한 경부/액와 선병증(cervical/axillary adenopathy) |
| · 24시간 이상 지속되는 운동 후 권태감                           |

아직까지 코로나19와 연관된 장기간의 피로 증상과 코로나19의 중증도, 혹은 염증과 관련된 실험실적 검사수치들 사이의 연관성은 보고되지 않았고, 다만 이전에 우울이나 불안을 진단받은 여성 환자들에게서 과도하게 피로 증상이 발생하는 것이 보고되었다[71]. 코로나19 이후 주요 증상으로 피로가 12주 지나서도 지속되면, 우선 발병 날짜와 피로와 동반되어 나타나는 증상이나 징후의 존재, 혹은 피로의 원인이 될 만한 사회심리적/정서적 요인이나 약물, 수면 장애, 독소 노출 등에 대한 사항을 살피고, 추가적으로 현재의 피로감과 연관될 수 있는 코로나19 이전부터 가지고 있던 기저질환의 존재 여부 혹은 중증 코로나19로부터 발생한 후유증의 존재 여부 등 피로와 공존하는 기타 현재 증상에 대한 구체적인 병력 확인이 필수적이다. 이와 함께, CBC with differential counts, 전해질 검사(sodium, potassium, chloride, bicarbonate, calcium, phosphate 등), LFT, renal profile, ESR, CRP, ferritin, d-dimer, TFT, muscle enzyme, plasma cortisol 수치 등을 평가하고, 생체징후, 산소포화도, 심전도, 흉부 엑스레이, spirometry 및 영양평가를 추천하며, 이러한 평가를 통해 기질적인 이상소견이 없다면 만성 피로증후군 평가기준에 적합한지 평가한다 (표 4).

표 4의 평가기준 중 4가지 이상의 기준이 충족되면 코로나19 관련 만성피로증후군(chronic fatigue syndrome associated with COVID-19)으로 진단할 수 있다[45]. 기준이 충족되지 않는다면 설명되지 않는 코로나19후 피로감(unexplained post-COVID-19 fatigue)으로 판단하여 그동안의 평가 항목들 뿐만 아니라 심리적 요인 및 연관된 신체 상태를 재평가하고 재활, 지지 등의 신체 활동 프로그램을 적용하면서 6개월 뒤에 만성피로증후군 평가기준을 재평가한다 (그림 2).

**6) 관절통과 근육통**

코로나19 진단 6개월, 12개월 후 조사된 국내연구에 따르면 관절통은 6개월 후 11%, 12개월 후에는 7%, 근육통은 6개월 후 6%, 12개월 후 2%의 환자에게서 보고되었으며[13], 이는 다른 외국 연구결과와 유사한 수준이다; 관절통 4-12주에 10-48%, 3-6개월에 9% (95% 신뢰구간, 5.7-15), 근육통 4-12주에 1-32%, 3-6개월에 11% (95% 신뢰구간, 6.2-19.8) [9, 15]. 코로나19와 동반된 횡문근융해 증례보고는 여러 건이 있으나[72-75], 대부분 급성기(증상발생 4주 이내)에 발생하였으며 중증환자의 경우 아급성기(증상발생 4주-12주)에도 발생보고가 있으나 증상 발생 12주 이상 경과한 환자에게서 발생하는 보고는 없었다. 코로나19 발생 6주 이후에 증상이 지속되는 189명을 대상으로 시행된 연구에서 혈청 류마티스 검사 결과(anti-cardiolipin antibody, anti-nuclear antibody, rheumatoid factor)는 대조군과 비교하여 통계적으로 유의한 차이는 없었다[76]. 그러나 해당 연구에서 증상 지속군 189명 중 근육통/관절통을 호소하는 환자 수가 적어 (각각 11명, 6명) 해당 연구를 근거로 만성 코로나19증후군 환자에서 류마티스 질환 혈청검사

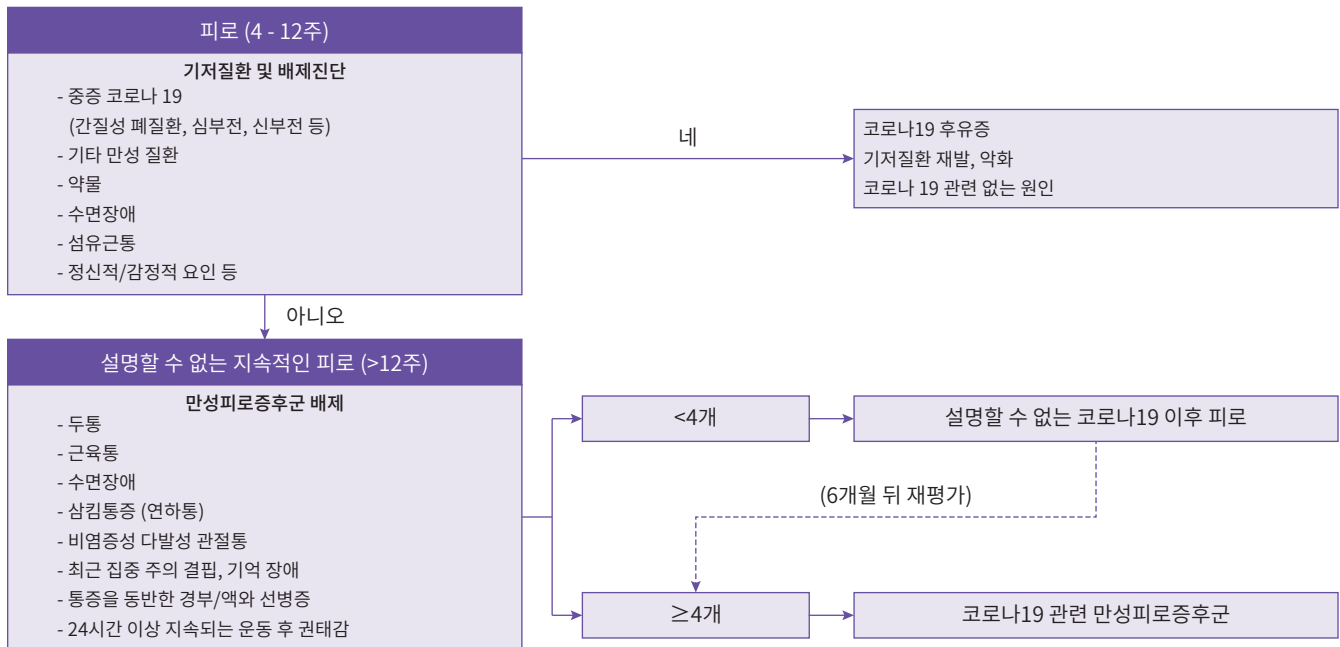

그림 2. 코로나19관련 만성피로증후군의 진단적 접근[45].

의 유용성이 없다고 판단할 수는 없다. 만성 코로나19증후군의 증상으로 관절통, 근육통이 존재함을 보고하는 상당수의 연구들이 있으나 근생검, 근조직병리학, 골격근 영상의학검사를 함께 시행하여 보고한 연구는 없었다. 대부분의 연구에서 만성 코로나19증후군에서 보이는 근육약화를 사이토카인 폭풍(cytokine storm)과 연관된 것으로 추정하고 있다. 현재까지 만성 코로나19증후군에서의 근육통 발생의 병태생리학적 원인은 잘 모르는 상태이다[77].

### 7) 두통

두통은 코로나19 환자의 흔한 증상 중 하나이며(14%에서 60%까지 보고마다 다양함), 코로나19 급성기가 끝난 뒤에도 수주간 지속되기도 한다[78]. 메타분석 연구에서는 코로나19 3개월 이후에도 두통을 호소하는 비율은 15% (95% 신뢰구간, 4.5-25.8)로 보고되었다[79]. 만성 코로나19증후군 관련 두통은 기존 두통이 전보다 악화된 경우가 있고, 새롭게 발생한 경우도 있다. 공통적인 특징은 코로나19 진단 시 또는 약간의 시차를 두고 발생된 두통이 거의 매일 지속된다는 점이다. 감염 시에 활성화되는 면역/염증 반응이 두통 증상을 발생시키거나, 기존의 편두통을 악화 또는 만성화 시키기 때문인 것으로 생각된다[80]. 만성 코로나19증후군 관련 두통은 코로나19 바이러스와 직접적으로 관련되어 있기 보다는 일반적으로 바이러스 감염 후 오래 지속될 수 있는 증상으로 보는 것이 타당하다[78]. 과거 Epstein Barr virus 감염 후 3개월이상 지속되는 신생 매일 지속 두통(new daily persistent headache)에 대한 보고가 있었으며, 1890년 러시아 독감 대유행(Russian flu pandemic) 이후에도 감염 후 신생 매일 지속 두통이 나타나는 것에 대한 보고가 있었다[81, 82]. 이러한 감염 후 신생 매일 지속 두통과 만성 코로나19증후군 관련 두통 간의 유사성에 대해서는 앞으로 더 많은 연구가 이루어져야 할 것으로 보인다.

두통이 있을 경우 가장 중요한 것은 기질적 원인이 있는 이차성 두통을 배제하는 것이다. 우선 병력청취를 통해서 두통양상을 파악하고 면밀한 신경학적 진찰을 통해서 국소적인 신경

학적 이상이 있는지 확인해야 한다. 발열, 구토나 체중감소와 동반된 두통, 암환자 또는 면역억제환자의 두통, 신경학적 이상소견이 동반된 두통, 유두부종이 동반된 두통, 심한 두통이 1분내에 최고도에 이르는 벼락 두통, 50세 이후에 새로 발생한 두통, 시간의 경과에 따라 점점 심해지는 두통, 발살바 수기(Valsalva maneuver)와 유사상황에서 나타난 두통이나 기립 시 악화되는 두통은 기질적 원인에 의한 두통이 의심되므로 뇌 영상의학검사(자기공명영상 또는 컴퓨터단층촬영)를 고려해야 하며, 전문적 평가와 치료를 위해 신경과 전문의에게 의뢰한다. 기질적 원인이 배제될 경우 원발성 두통에 준하여 진료한다[45].

### 8) 인지관련(neurocognitive) 증상

코로나 감염 후 3개월 이상 지난 시점의 신경학적 증상의 유병률을 조사한 메타분석에서 집중력 저하는 22% (95% 신뢰구간, 7.3-36.4), 브레인 포그(brain fog)는 32% (95% 신뢰구간, 10.3-54.0), 기억력 저하는 28% (95% 신뢰구간, 21.5-35.4)로 나타났다[79]. 국내 연구에 따르면, 코로나19 환자에서 6개월, 12개월 뒤에 남아있는 증상을 조사하였을 때 신경학적 증상의 유병률은 집중력 저하(concentration difficulties)가 22%, 기억력 저하(amnesia)가 20%, 인지저하(cognitive dysfunction)가 21%이었다[13].

만성 코로나19증후군 관련한 인지증상이 있을 때 다른 원인의 감별이 필요하거나, 직업적, 사회적 기능 저하로 이어질 정도로 증상이 심한 경우 뇌영상검사와 신경심리검사 등을 고려할 수 있으며[4, 83], 전문적인 평가와 치료를 위해 신경과 전문의에게 의뢰한다[3, 69]. 그리고 보통 임상에서 시행되는 신경심리검사들은 고령의 치매환자들을 대상으로 만들어진 것이기 때문에 만성 코로나19증후군과 같이 젊은 환자들에서, 일상생활에 제한을 줄 정도의 심한 인지기능저하가 아닌 집중력 저하/명함을 호소하는 경우에는 평가에 적합하지 않은 경우가 많다. 따라서 이에 적합한 예민한 인지 검사도구를 개발하고 검증할 필요가 있다[3].

최근 코로나19에 감염되었던 환자들의 뇌영상 소견에 대한 연구들이 발표되고 있다. 영국 뇌은행(UK brain bank)의 코호트에서 코로나19에서 회복한 환자 401명을 대조군 384명의 뇌자기공명영상을 비교했을 때 안와전두피질(orbitofrontal cortex)와 해마결이랑(parahippocampal gyrus)의 회백질 두께가 감소하였고, 일차 후각피질과 기능적으로 연결된 부분에서 조직 손상과 관련된 표지자들이 더 많이 변화하였으며, 전반적인 뇌 크기가 더 감소하였다[84]. 또한 만성 코로나19증후군 환자 35명에서 뇌 양전자 단층촬영(positron emission tomography and computerized tomography, PET-CT)을 시행한 연구에서 뇌간과 소뇌의 대사가 저하될 수록 호소하는 증상의 수가 많아지는 상관관계를 보였다[85].

코로나19 후 인지검사에 대한 연구 발표들도 있다. 과거 치매 병력이 없었던 코로나19 회복 환자 740명의 신경심리 검사 및 건강 기록을 분석한 결과, 정보처리속도(processing speed) 감소(18%), 집행능력(executive functioning) 저하(16%), 음운 유창성(phonemic fluency)(15%), 범주 유창성(category fluency)(20%), 기억 인코딩(memory encoding)(단기 기억을 장기 기억으로 변환하는 과정)(24%), 기억 회상(memory recall)(23%) 과제에서 기능 저하가 드러났다. 코로나19를 심하게 앓았던 환자는 인지 후유증이 발생할 가능성이 더 컸다[86]. 또 다른 연구에서는, 코로나 19 진단되었던 60세 이상 1438명을 대상으로 1년 뒤 인지기능 변화를 추적하였는데 인지저하 발병률은 12% 였고 코로나19 환자군에서 대조군에 비해 인지검사 점수가 유의미하게 낮았다. 심한 감염 환자군은 경미한 감염 환자군이나 대조군보다 인지기능 점수가

낮았고, 진행되는 인지저하 위험도가 높았다[41]. 이렇게 만성 코로나19증후군 관련 인지증상에 대한 신경심리검사, 뇌영상 검사들을 근거로 한 최근 연구들이 보고되고 있으나, 장기적인 예후에 대해서는 앞으로 더 많은 연구가 필요하다.

### 9) 심리적/정신적 증상

코로나19환자에서 정신건강에 대한 평가는 중요하다[87]. 원인이 바이러스의 직접적 영향에 기인한 것이든 부정적 사건 경험에 의한 반응으로 나타난 것이든 반드시 관심을 가져야 한다. 왜냐하면 정신건강은 환자의 삶의 질에도 영향을 주고 만성 코로나19증후군으로 인한 다른 증상의 발현에도 영향을 줄 수 있기 때문이다[45]. 정신사회적 평가에 포함되는 사항은 우울, 불안, 외상 후 스트레스 장애 및 정신병적 증상 선별, 자신이나 타인을 해칠 위험, 갑작스런 사망에 대한 애도, 코로나19 관련 생활 스트레스(예를 들어 빛, 실직 혹은 취업 어려움, 대인관계 문제) 등이다[88]. 특히, 심각한 정신과적 증상이 있거나 자해 혹은 타해 위험이 있는 환자는 개입이 늦어지는 것을 막기 위하여 신속하게 정신건강의학과 진료를 의뢰한다[3]. 조기에 도움을 받을수록 더 효과적인 개입이 이루어지기 때문이다. 연구에 의하면 주변의 도움을 받지 못하는 환자는 불안 및 정신건강 악화로 고통받을 수 있다[3].

불안, 우울, 외상 후 스트레스 장애가 코로나19로 입원 및 퇴원 2-3개월 후 16-47%에서 보고되었다[89, 90]. 격리 입원 중 코로나19 환자는 자신이나 타인의 건강에 대한 걱정, 신체적 사회적 격리, 잠재적 사망 위험성, 타인 감염 위험에 대한 걱정, 돌봐야 할 가족을 남겨두고 온 것에 대한 걱정, 생계의 위협, 무력감, 지루함과 외로움을 경험할 수 있다. 이러한 스트레스는 새로운 정신과 증상을 촉발하거나 기존 정신건강 상태를 악화시킬 수 있다[91]. 기존 신경정신과 질환 혹은 물질 사용 장애는 코로나19의 경과를 악화시키거나 장기 합병증의 위험을 증가시킬 수 있다[83, 92]. 격리 병실에 입원 되었던 환자는 신체활동이 감소되는데 특히 노인에게는 문제가 된다[45]. 신체 기능 감소는 불안과 우울과 같은 정신건강 문제를 증가시킬 수 있다. 또한, 코로나19 후 급성 스트레스, 입원 환경적 요인, 침습적 내과 시술(예, 기계호흡)과 여러 종류의 약물 병합으로 인해 수면 문제의 위험이 증가할 수 있다[93]. 중환자실 입원 경험은 장기적으로 지속되는 기능 저하, 외상 후 스트레스 장애, 우울증을 증가시킬 수 있다[94]. 불안장애 발생률이 17%, 정신병적 장애 발생률이 1.2%로 보고된 연구에서 중환자실에 입원했었던 환자에서 해당 발생률이 특히 더 높았다[40]. 심리적 혹은 정신적 증상이 있는 환자를 진료할 때는 빈곤, 차별, 사회적 고립 상황은 아닌지 사회적 인자를 고려하는 것이 중요하다[45]. 사회적 연결감, 사회적 지원, 지역사회 기반 조치 등이 정신건강과 웰빙에 도움이 될 수 있다.

뇌영상의학적 연구 결과를 살펴보면, 코로나19 환자 35명에서 진단 후 평균 96일에 PET-CT를 시행하여 대조군과 비교한 연구에서 코로나19를 앓았던 환자들에서 특정 뇌부위에 대사저하 소견을 발견하였고 그것이 후각 감퇴증(hyposmia), 후각 상실, 기억력 혹은 인지능력 저하, 통증, 불면증과 관련성이 있었다[95]. 58명의 중등도-중증 코로나19 환자 대상 전향적 연구에서 진단 2-3개월 후 뇌 자기공명영상 시행결과 32명이 대조군에 비하여 시상(thalamus)과 시상층(sagittal stratum)부위에 이상 소견을 보였다[53].



### 핵심질문 3) 만성 코로나19증후군 환자에게 혈전 예방을 해야 하는가?

#### 권고안

- 만성 코로나19증후군 환자에게 일상적으로 혈전 예방을 위한 항응고제나 항혈소판제를 투여하는 것은 권고하지 않는다. 만성 코로나19증후군 환자의 혈전 예방 여부는 일반적인 혈전 위험과 출혈 위험 평가에 따라 결정한다. 혈전 예방이 필요하다고 판단되는 경우 관련 분야 전문의의 진료를 받도록 한다.

미국 국립보건원(NIH)의 코로나19 진료지침에서는 기저질환으로 항응고제나 항혈전제를 처방받는 경우는 해당 약제를 유지하지만 혈전증을 시사하는 증상이나 징후가 없는 환자에서 일상적인 혈전증에 대한 선별 검사는 권하고 있지 않다. 또한 입원이 필요하지 않은 코로나19 환자에서 혈전 예방을 위한 항응고제나 항혈전제 투여를 권고하지 않는다. 코로나19로 입원이 필요한 환자의 경우 임신부가 아닌 성인에서는 저분자량 헤파린(low molecular heparin, LMWH)이나 비분획 헤파린(unfractionated heparin, UFH)의 사용이 권고된다. 하지만, 퇴원 이후에 일상적으로 혈전 예방을 위한 약제를 투여하는 것은 추천되지 않고 있다[96]. 브라질에서 시행된 다기관 무작위 대조군 임상연구에서 혈전 발생 위험이 있는 코로나19 환자에서 퇴원 후 35일까지 rivaroxaban (10 mg/일)을 투여 받은 군에서 대조군에 비하여 혈전 발생이 통계적으로 유의하게 적었다[97]. 하지만 이 연구는 약제 투여 기간이 짧아 만성 코로나19증후군 환자의 장기간 혈전 예방 치료를 지지할 수 있는 근거가 되기 어렵다. 미국 국립보건원 진료지침도 임상 연구 목적을 제외하고는 코로나19 환자가 퇴원한 이후에 일상적으로 혈전 예방을 위한 약제 투여를 지속하는 것은 추천하지 않으며, 만성 코로나19증후군 여부와 관계없이 혈전 발생의 위험과 출혈 위험을 따져 혈전 예방 여부를 결정하도록 권고하고 있다[96]. 이와 같이 만성 코로나19증후군 환자에서 일상적으로 혈전 예방을 권고할 수 있는 근거는 없다. 따라서, 만성 코로나19증후군 환자의 혈전 예방 여부는 환자의 기저질환 및 현 상태에 따라 일반적인 혈전 위험과 출혈 위험을 따져 결정하는 것이 타당하겠다.

### 핵심질문 4) 만성 코로나19증후군 환자에게 일반 재활/호흡기 재활 치료가 필요한가?

#### 권고안

- 중환자실에서 치료 받았던 중증 코로나19 환자나 65세 이상 환자에서 만성 코로나19증후군이 지속된다면 재활 전문의와 상의하여 적절하고 구체적인 호흡기 재활에 대해 고려할 수 있다.

코로나19를 포함한 간질성 폐 질환에서 호흡기 재활의 효과에 대해 평가한 체계적 문헌고찰과 메타분석에 따르면 호흡기 재활은 환자들의 걷는 거리와 삶의 질을 향상 시키고 호흡곤란과 폐 기능을 개선하였다[98]. 코로나19 진단 후 6개월 지난 65세 이상 환자 72명을 대상으로 시행한 무작위 대조군 임상연구에서 매일 10분 호흡기 재활(호흡기 근육 훈련, 기침 연습, 횡격막 훈련, 스트레칭, 홈 트레이닝)을 6주 동안 시행하였을 때, 폐기능검사의 여러 지표(forced expiratory volume in 1 second, FVC, DLCO), 6분 보행 거리, 삶의 질, 불안, 우울감과 일상생활의 활동력이 향상되었다[99]. 대부분 중환자실에 입원했던 중증 코로나19 환자를 대상으로 입원 후 10일째부터 2-4주 동안 심폐 재활프로그램을 적용한 전향적 코호트 연구에서 6분 보행 거리와 기분이 개선되었다[100]. 중환자실 입원했던 코로나19 퇴원 환자 33명을 대상으로 시행한 전향적 코호트 연구에서 다양한 치료적 운동을 매일 30분 시행 후 4미터 걷는데 걸리는 시간, 6분 보행 거리와 삶의 질이 개선되었다[101]. 한 연구에서 증상이 지속되는

코로나19 환자 106명을 세 군으로 나누어, 44명은 비대면 원격 재활치료를, 25명은 자가 재활치료를, 17명은 독립적인 운동 프로그램을 시행하였고, 20명은 아무런 개입도 하지 않았다. 비대면 원격 재활치료군과 자가 재활치료군에서 하지 근력 강화와 심폐기능의 개선이 통계적으로 유의하였다[102]. 국내에는 보건복지부 국립재활원에서 코로나19 격리해제자를 위한 재활 안내서를 일반 국민을 위해 정보 제공용으로 배포하였고 호흡 관리, 일상생활활동 관리, 신체 활동과 운동, 인지(주의력, 기억력 등) 관리, 삼키기 관리, 목소리 관리에 대한 내용이 포함되어 있어 참고할 수 있다[103].

### 핵심질문 5) 지속되는 호흡기 증상은 어떻게 치료하는가?

#### 권고안

- 만성 코로나19증후군에서 지속되는 호흡기 증상(호흡곤란, 기침)에 대해 특정 약물 치료를 (corticosteroid, anti-histamine, ipratropium bromide, aminophylline, codeine) 권고하거나 제한할 근거가 부족하다.

코로나19로 입원했던 환자 중 퇴원 후 6주 시점에 기질화폐렴(organizing pneumonia)으로 진단된 30명의 환자들을 대상으로 prednisolone (0.5 mg/kg/day)를 3주간 사용한 소규모 전향적 연구에서, 모든 환자에게서 증상의 개선과 DLCO, FVC 및 영상검사에서의 개선이 확인되었다[104]. 그러나 또 다른 연구에서는 유사한 환자군에서 12주 이내에 증상이 자연적으로 개선되었음을 보고하고 있어[105], 스테로이드 치료의 이득은 불명확하다. 이외에 코로나19 이후 3개월 이상 경과된 49명의 환자에게서 항히스타민을 사용하였던 소규모 전향적 관찰연구에서는, 최소 4주간의 항히스타민제 병합(H1 antagonist + H2 antagonist) 사용군의 72%에서 호흡기 증상을 포함한 임상증상의 호전을 보이는 결과가 보고되었다[106]. 그러나 아직 만성 코로나19증후군에서 잘 디자인된 무작위 대조군 임상연구 결과를 통한 스테로이드 및 항히스타민제의 효과는 보고된 바 없다. 이외에 ipratropium bromide, aminophylline, codeine을 만성 코로나19증후군의 치료에 사용한 연구는 없다. 따라서 현재까지 보고된 연구결과로는 지속되는 호흡기 증상을 호소하는 환자의 치료에 특정 약물 치료를 권고하거나 제한할 근거는 부족하며, 개별 환자의 임상적 상황에 따라 각 약물의 위험-이득 (risk-benefit)을 따져 대증치료 목적으로 사용이 고려될 수 있겠다.

### 핵심질문 6) 후각/미각 장애는 어떻게 관리되어야 하는가?

#### 권고안

- 코로나19로 인한 후각/미각 장애에 대해 특정 치료를 권고할 수 있을 정도의 근거는 부족하다. 후각/미각 장애는 대개 수주에서 수개월 내에 서서히 회복이 된다. 후각 훈련이 기존 호흡기 바이러스 감염 후 후각 장애 치료에 도움이 되었고, 안전하고 쉽게 할 수 있는 치료법이기 때문에 코로나19로 인한 후각 장애 환자에서도 고려될 수 있다.

코로나19 급성기 이후에도 미각 이상을 호소하는 경우, 잇몸염(gingivitis)과 같은 치과적 질환이나 구강 아구창(oral thrush)과 같은 구강내 질환 발생으로 인한 미각 장애 가능성을 우선 배제해야 한다. 또한 부작용으로 미각 장애를 초래할 수 있는 약제를(angiotensin-converting enzyme inhibitor, angiotensin receptor blocker, calcium channel blocker, macrolide 등) 새로이



시작했는지 확인이 필요하다. 미각 이상 증상의 대부분은 후각 이상에 의한다고 알려져 있어 우선 후각 장애 여부에 대한 확인이 필요하다[107]. 코로나19 후유증으로 발생된 미각 장애는 대개 시간이 지나면 호전이 되며, 미각 장애 치료에 대한 연구 자료는 아직 없다.

만성 코로나19증후군으로 후각 장애를 지속 호소하는 경우 비부비동염(rhinosinusitis), 코폴립(nasal polyp), 알레르기비염 등의 코나 부비동 질환에 의한 가능성을 배제해야 한다. 후각 이상 증상도 대개 시간이 지나면 호전이 되나, 일부 환자들은 수개월 이후에도 지속된다. 단 기간에 호전되는 후각 이상은 국소 염증에 의한 후각 계통의 폐쇄 현상으로 인한 것으로 이해되며, 장기간 지속되는 후각 장애는 후각 상피 손상이나 후각 계통 신경 손상으로 설명된다[108]. 코로나19 환자의 후각 장애 치료에 대한 연구는 아직 부족하며, 호흡기 바이러스에 의한 감염 후 후각 장애(postinfectious olfactory dysfunction) 치료에 대한 무작위 대조군 임상 연구들을 참고로 할 수 있겠다. Addison 등의 Clinical Olfactory Working Group은 호흡기 감염 후 후각 장애 치료에 대한 무작위 대조군 임상연구를 중심으로 체계적 문헌 고찰을 하여 권장안을 제시하였다[109]. 이들은 후각 훈련(olfactory training)을 적극적으로 권장하였고, 후각 장애 개선에 도움이 될 수 있어 금연을 권고하였다. 또한 비강내 또는 전신 스테로이드, 아연, 알파-리포산( $\alpha$ -lipoic acid), 비타민A, theophylline, minocycline이나 caroverine 치료에 대해서는 질 높은 연구가 부족하여 추가 연구가 필요하다고 하였다[109]. 코로나19 환자 100명을 대상으로 한 무작위 대조군 임상연구에서 후각 훈련 및 비강내 스테로이드 분무(mometasone nasal spray) 치료와 후각 훈련 단독 간에 통계적으로 유의한 차이는 없었다[110].

후각 신경은 재생 가능하므로 반복적인 후각 훈련을 통해 후각 기능을 회복시킬 수 있다. 일반적으로 후각자극물질 네 가지를 종류별로 10초씩 코로 냄새 맡는 후각 훈련을 매일 하루 2회 아침, 저녁으로 반복하여 감염 후 후각 장애의 개선 효과를 기대할 수 있다[111, 112]. 전통적으로 후각 훈련에는 정향(clove), 유칼립투스, 장미, 레몬 등의 4가지 후각원이 사용되는데, 한국인에 익숙한 후각원을 사용해도 같은 효과를 기대할 수 있다[113]. 환자가 직접 집에서 후각 훈련을 할 수도 있는데, 후각원으로 향이 있는 에센셜 오일(essential oils)이나 시중에 판매하는 후각 훈련 키트를 이용할 수 있다. 후각 훈련은 비용이 저렴하고 전신 부작용이 거의 없다는 장점을 가지고 있어 코로나19 이후 지속되는 후각 장애 치료에 적극적으로 사용해 볼 수 있겠다.

### 핵심질문 7) 피로감은 어떻게 관리되어야 하는가?

#### 권고안

- 만성 코로나19증후군 환자의 피로에 대한 특정 치료를 권장하거나 제한할 근거가 부족하다.

만성 코로나19증후군과 연관된 만성피로증후군의 해결을 위해 다양한 약물, 대체의학, 인지 행동 치료, 운동 등 여러 방법들이 고려되었다. 일부 연구에서 rintatolimod라는 약물과 상담 요법 및 단계별 운동요법이 이점이 있음을 시사했지만[114, 115], 이에 대한 연구들은 피로감 중재방법 및 효과가 서로 다르고 자료가 제한적이다. 만성 코로나19증후군 환자의 피로 관리를 위한 치료 및 중재의 효과를 뒷받침하는 높은 근거 수준의 연구는 아직 부족하다.



핵심질문 8) 두통이나 인지관련 증상은 어떻게 치료하는가?

권고안

- 만성 코로나19증후군 관련된 두통의 경우 기질적 원인이 배제된 후에는 원발성 두통에 준하여 대증적 치료를 고려할 수 있다. 특히 편두통 양상으로 지속되어 일상생활에 지장을 초래할 경우 편두통 예방치료를 고려할 수 있다.
- 만성 코로나19증후군과 관련된 인지저하의 경우 특정 치료를 권고하거나 제한할 근거가 아직 부족하다.

만성 코로나19증후군 관련 두통에 대해 적절한 치료법에 대한 근거를 제시한 연구는 거의 없다. 기존에 원발성 두통이 있고 코로나19가 악화 요인인 환자의 경우 환자의 개별 특성과 두통에 따라 대증 및 예방 치료를 고려할 수 있다[116]. 신생 매일 지속 두통(new daily persistent headache) 또는 전신 감염으로 인한 만성 두통의 진단 기준을 충족하는 경우, 임상 표현형이 편두통과 유사하다면 편두통의 예방치료를 따르는 것을 고려할 수 있다. 만성 코로나19증후군 관련 두통의 경우 매일 지속되는 특성 때문에 약물과용두통(medication overuse medication)의 발생 위험이 높다. 3개월간 triptan 이나 마약성 진통제를 한 달에 10일 이상, 단순 진통제를 한 달에 15일 이상 복용할 경우 약물과용두통이 발생 가능하다. 따라서 약물과용두통을 예방하기 위해 이에 대해 환자에게 알리고 적절한 예방치료를 고려한다[116]. 두통 발작(headache attack)이 있을 때는 비스테로이드소염제(non-steroidal anti-inflammatory drug, NSAID), triptan 등을 급성기 발작의 치료제로 사용할 수 있다. NSAID는 안지오텐신 전환 효소(angiotensin converting enzyme 2) 과발현에 대한 잠재적인 역할 때문에 코로나19 환자에서 안전성에 의문을 제기하는 초기 보고들에도 불구하고 경미한 두통발작이 있을 때 안전하게 사용할 수 약물이다[117]. 중등도(moderate) 이상의 두통 발작에서는 triptan을 고려할 수 있다. 가장 많이 쓰이는 두통 치료의 약제들은 표 5와 같다[118].

두통이 기분장애, 수면장애, 가족, 직장 및 대유행과 관련된 사회경제적 어려움으로 인한 스트레스와 관련이 있는 경우, flunarizine 및 베타-차단제는 우울 증상을 악화시킬 수 있다. Topiramate는 인지저하의 원인이 될 수 있으므로 만성 코로나19증후군 증상으로 인지저하, 기억력 저하가 동반된 경우 주의해야한다. 약물치료와 함께 규칙적인 생활 방식 유지, 운동, 장기간의 단식을 피하는 등 생활습관교정이 같이 이루어져야 한다[116]. 특히 코로나19 후에 흔한 수면문제가 두통과 관련이 있기 때문에, 수면문제를 해결하는 것이 두통을 조절하는데 도움이 될 수 있다[47].

만성 코로나19증후군 관련한 인지저하에 대한 치료 및 관리에 대한 구체적인 근거는 아직 부족하다. 그러나 만성 코로나19증후군에서 나타나는 브레인 포그(brain fog)는 일상생활에 제

표 5. 두통 치료 약제[118]

| 분류     | 약물            | 기전       | 1일 용량범위       | 부작용                                                                                      |
|--------|---------------|----------|---------------|------------------------------------------------------------------------------------------|
| 예방 치료  | Propranolol   | 베타 차단제   | 20 - 160 mg   | 피로, 어지럼, 우울, 생생한 꿈                                                                       |
|        | Flunarizine   | 칼슘통로 차단제 | 5 - 10 mg     | 체중증가, 졸림, 입마름, 어지럼, 저혈압, 우울, 파킨슨증                                                        |
|        | Amitriptyline | 삼환계 항우울제 | 2.5 - 50 mg   | 체중증가, 변비, 무력증, 어지럼, 졸림, 피로, 시야흐림, 입마름                                                    |
|        | Topiramate    | 뇌전증약     | 12.5 - 150 mg | 감각이상, 체중감소, 기억장애                                                                         |
| 급성기 치료 | Frovatriptan  | Triptan  | 2.5 - 5 mg    | 트립탄 감각(저림, 옥싌거림, 이상한 느낌, 온열감, 작열감, 냉감, 목과 가슴을 포함한 몸의 압박감 및 조임), 어지럼, 졸림, 피로, 무력증, 두통, 구역 |
|        | Naratriptan   | Triptan  | 1 - 2 mg      | 트립탄 감각, 어지럼, 졸림, 피로, 무력증, 두통, 구역                                                         |
|        | Zolmitriptan  | Triptan  | 2.5 - 7.5 mg  | 트립탄 감각, 어지럼, 졸림, 피로, 무력증, 두통, 구역                                                         |



한을 줄 정도로 심하기 보다는 인지검사에서 경미한 이상소견을 보이거나 이상소견이 뚜렷하지 않다는 점에서 케모브레인/케모 포그 (chemo brain /chemo fog)에 비유가 되기도 한다[119]. 케모브레인/케모 포그란 항암치료를 받은 생존자에서 집중력 저하, 기억력 저하 등 인지저하를 호소하지만 인지검사항 이상 소견이 뚜렷하지 않은 경우를 말한다. Mayo Clinic에서 제안한 케모브레인/케모 포그 관련 권고를 참고하면, 규칙적인 운동, 무엇이 기능저하에 영향을 미치는지 추적하는 것, 스트레스 해소 및 대처전략을 세우는 것을 고려하여야 한다. 또한 만성 코로나19증후군 관련 인지 증상과 연관되어 있다고 알려져 있는 피로, 우울, 불안, 수면문제에 대해 적극적으로 관리하는 것이 필요하다[120]. 이외에 methylphenidate, modafinil, donepezil, memantine 등의 약물치료가 제안된 바 있으나[120], 추가 연구가 필요하다. 그리고 천연 플라보노이드(natural flavonoid)인 luteolin이 비만세포(mast cell)와 미세아교세포(microglia)의 활성화를 저해함으로써 만성 코로나19증후군 관련 브레인 포그 증상의 잠재적인 치료제로 제안된 바 있으나 추가 연구가 필요하다[121].

**핵심질문 9) 심리적/정신적 증상은 어떻게 치료하는가?**

**권고안**

- 만성 코로나19증후군으로 주요우울장애가 있을 때 선택적 세로토닌 재흡수 억제제(selective serotonin reuptake inhibitor, SSRI) 사용이 효과적이었다는 연구가 있으나 아직 특정 치료를 권고하거나 제한할 근거가 부족하다.
- 만성 코로나19증후군 환자에서 정신건강의학과 약물 치료가 필요한 경우에는 정신건강의학과 진료를 권고한다.

이탈리아에서 코로나19 후에 주요 우울 삽화를 호소하는 60명에게 SSRI를 투여했을 때 92%의 환자에서 4주 후에 Hamilton Depression Rating Scale이 50% 이상 감소가 있었다고 보고하였다[122]. 삼환계 항우울제(tricyclic antidepressants)로서 항염증 작용이 있고 중추신경계를 투과하는 clomipramine이 코로나19 후 중추신경계에 대한 후유증의 잠재적 치료제로 제안된 바 있으나 무작위 대조군 임상연구를 통해 증명되지는 않았다[123]. 내약성이 더 나은 다른 항우울제, 예를 들어 SSRI도 항염증 작용이 있을 수 있으므로 후보 치료제로서 철저한 연구와 임상시험이 필요하다. SSRI의 일종인 fluvoxamine이 만성 코로나19증후군의 새로운 치료제로 제안된 바 있다[124-126]. Fluvoxamine을 급성 코로나19 초기 단계에 사용하였을 때 임상 증상 악화를 막는 데는 효과가 입증되었다[127]. 따라서 기분 장애가 없는 만성 코로나19증후군 환자에서 항우울제의 일상적 투여를 권고할 수 있는 근거는 없고 항우울제 투여가 필요한 경우에 정신건강의학과 전문의의 진료를 받도록 하는 것이 바람직하겠다.

코로나19로 인한 L-tryptophan의 흡수와 대사에 장애를 일으킴으로써 만성 코로나19증후군을 야기한다는 연구 결과도 있다[128, 129]. L-tryptophan의 흡수 조절을 장기적으로 방해하고 대사에 있어서 kynurenines pathway를 선호함으로써 kynurenine 수치를 높이고 L-tryptophan 부족 현상과 유사한 우울, 불면, 피로, 근육 약화와 같은 증상이 생긴다는 것이다. 그러나 아직 L-tryptophan투여가 만성 코로나19증후군 치료로 효과가 있는지는 알 수 없다[130].

### 핵심질문 10) 만성 코로나19증후군 환자에게 스테로이드 투여가 도움이 되는가?

#### 권고안

- 만성 코로나19증후군 환자에서 스테로이드 투여를 권고하거나 제한할 근거가 부족하다. 스테로이드 사용에 따른 이득과 부작용을 고려하여 투여 여부를 결정해야 한다.

만성 코로나19증후군의 인지장애, 두통, 후각/미각 장애가 지속되는 신경염증(neuroinflammation)에 의한 것으로 추정하는 연구들이 있다[131]. 또한 코로나19 바이러스에 의해 유발된 염증반응이 미세혈관의 장애와 폐섬유화를 유발하여 심혈관계와 호흡기계의 증상을 낳는다는 가설도 있다[131]. 스페인에서 시행된 121명의 경증 코로나19 환자를 대상으로 한 단면 연구에서는 호중구수(neutrophil count), CRP, fibrinogen의 조합이 정상 범위에 있더라도 다소 높은 환자들에서 만성 코로나19증후군을 겪을 위험이 높다고 보고하였다[132]. 이러한 가설에도 불구하고 실제 코로나19 환자에서 스테로이드 투여가 만성 코로나19증후군 발생 위험을 낮추고 기능이나 증상을 개선시키지는 분명하지 않다. 이집트에서 시행된 전향적 무작위 대조군 임상연구에서 코르티코스테로이드 비강 분무(corticosteroid nasal spray) 요법을 3주 동안 투여 받은 군을 그렇지 않은 군과 비교했을 때 후각 점수(smell score)에서 유의한 차이를 보이지 않았다[110]. 영국에서 시행된 관찰 연구에서는 4주 이후에도 지속되는 간질성 폐병변이 관찰되는 35명의 코로나19 환자에게 스테로이드를 3주 동안 투여하였을 때 유의한 폐기능의 개선이 나타난다고 보고하였으나 단일군 연구로 해석에 제한이 있다[104]. 게다가 코로나19 치료를 위해서 사용되는 스테로이드제의 투여가 털곰팡이증(mucormycosis), 무혈성골두괴사(avascular necrosis)와 같은 부작용과 연관된다는 보고들이 있다[133, 134]. 따라서 만성 코로나19증후군 환자의 기능이나 증상 개선을 목적으로 스테로이드 투여를 고려할 때는 이익과 위험을 개별적으로 따져보고 결정해야 하겠다. 또한 코로나19가 기존의 부신 기능저하증(adrenal insufficiency)을 악화시키거나 코로나19 후에 부신기능저하증이 새롭게 발병하여 만성 코로나19증후군으로 오인되는 경우가 있으므로 이에 대한 주의가 필요하다.

### 핵심질문 11) 소아청소년에서 만성 코로나19증후군의 진단과 치료를 위해 특히 유의해야 할 점은 무엇인가?

#### 권고안

- 소아청소년에서는 특히 다른 급/만성 바이러스 감염과 다양한 스트레스 상황에서의 신체화 증상들을 충분히 배제하여 신중하게 만성 코로나19증후군의 진단을 내려야 한다.
- 소아청소년의 만성 코로나19증후군에서 특별한 치료법을 권고하거나 제한할 만한 근거는 아직 없으나, 우선 일반적으로 권고되는 대증요법을 시행하고 증상의 지속 기간이 길거나 정도가 심한 경우에는 각 분야의 소아청소년 전문가에게 의뢰하여 추가적인 검사와 치료를 받도록 한다.

소아청소년에서는 잦은 호흡기 및 위장관 바이러스 감염으로 인해 비특이적인 증상들이 쉽게 발생하므로, 코로나19 급성기 후 발생하거나 지속되는 증상들을 코로나19로 인한 것으로 규정하기 쉽지 않다. 또한 청소년기에는 정신/신체적인 스트레스로 인해 쉽게 신경정신학적 증상은 물론 다양한 신체화 증상들이 발현할 수 있어서 역시 만성 코로나19증후군과의 감별이 어렵다. 게다가 아직 소아청소년에서 만성 코로나19증후군의 범위에 대해서도 관련 연구가 미미하다. 따라서 WHO에서는 소아청소년에서 만성 코로나19증후군의 일반적인 정의와

다른 기준을 적용하도록 권고하고 있지만, 아직 그 구체적인 기준이 공식적으로 제시된 바는 없다. 그럼에도 불구하고 일반적인 성인 기준을 적용하였을 때, 소아청소년에서는 만성 코로나19증후군의 발생률이 비교적 낮은 것으로 알려져 있다.

최근 외국에서 시행된 연구들에 의하면 코로나19 진단 4주 후까지 지속되는 증상의 발현률은 18세 이하 소아청소년에서 시행된 소규모 전향적 관찰연구들에서는 15-32%로[135-136], 청소년만을 대상으로 한 대규모 후향적 연구에서는 50%까지도 보고되었다[137]. 이들 연구에서 흔한 증상으로는 기침, 호흡불편감, 피로, 두통, 열감, 불면증, 무력감, 변비, 복통 등이 제시되었다. 2021년 1월부터 3월말까지 진단된 3,065명의 청소년(11-17세)을 대상으로 영국에서 시행된 연구(CLoCk study)에서는, 코로나19 진단 후 3개월에 존재한 증상으로 피로(39%), 두통(23%), 호흡불편(23%)이 흔했으나, 검사 음성이었던 3,739명의 대조군 청소년에서도 피로(24%), 두통(14%)은 비교적 흔하게 나타났다[138]. 특히 피로와 두통은 판데믹 이전에도 11-15세 연령에서 각각 30%, 20%에서 호소하는 증상이었기 때문에 만성 코로나19증후군의 증상으로 진단하는 것에 상당한 어려움이 있다[139].

덴마크에서 28,270명의 15-18세 청소년을 대상으로 한 환자-대조군 연구에서, 2개월 이상 지속되는 흔한 증상은 피로(18%), 식욕저하(10%), 두통(9%)이었으나, 대조군과의 비교에서 유의하게 많았던 증상은 호흡불편감(odds ratio [OR] 2.7), 기침(OR 1.6), 인후통(OR 1.6)이었다[137]. 또 다른 연구에서 0-17세 대상으로 37,522명의 환자군과 78,037명의 대조군을 비교했을 때, 4주 이상 지속되는 증상에 대해서 학동기 전에는 피로, 후각/미각 소실, 근무력이, 학동기 연령에서는 후각/미각 소실, 피로, 호흡기 증상, 어지러움, 근무력, 흉통이 환자군에서 대조군에 비해 유의하게 많았다[140]. 이와 같이 기존 연구들의 결과는 매우 다양한 증상들과 빈도를 나타내고 있고, 증상의 종류도 상당히 주관적이거나 비특이적인 것이 많으므로, 만성 코로나19증후군 이외의 진단과 원인에 대해 충분한 고려와 평가가 필요하다.

만성 코로나19증후군은 어린 영아/소아보다는 청소년에서, 특히 기존에 신체/정신 건강 수준이 낮은 경우에 좀 더 흔하게 발생하는 것으로 알려져 있다. 최근 코로나19 입원환자를 대상으로 한 연구에서는 급성기 중증도에 따른 만성 코로나19증후군 발생률의 차이는 없었고[135], 성인과는 달리 성별의 차이도 적었으나[136], 청소년만을 대상으로 한 연구에서는 여아에서 좀더 흔한 경향을 보이기도 했다[137]. 입원을 하지 않은 청소년을 대상으로 한 영국의 연구에서는 남아보다는 여아에서, 11-14세보다는 15-17세에서, 기존에 신체/정신 건강수준이 낮을수록, 2개 이상의 장기에 해당하는 증상을 가지고 있을 가능성이 더 높았다[138]. 따라서 현재 신체/정신적 동반질환이 있는 청소년에서는 조금 더 만성 코로나19증후군의 가능성을 고려해야 한다.

소아청소년에서 코로나19 후 지속되는 증상들은 대부분 3개월 이내에 호전을 보이는 것으로 알려져 있어[135, 136, 140], 만성 코로나19증후군의 일반적인 진단 기준을 만족하지 않고 저절로 호전될 가능성이 있다. 다른 원인이 충분히 배제되고, 진단 후 12주가 지나서도 지속되는 증상들에 대해서는 우선 일반적인 바이러스 감염 혹은 기능성 장애 시 권고되는 대증요법들을 시행하며 경과를 관찰해 볼 수 있다. 여기서 특정한 약제를 추천 혹은 배제할 만한 근거는 아직 없다. 과도한 운동, 신체/정신 활동 및 스트레스가 만성 코로나19증후군의 악화/재발에 기여하는 것으로 알려져 있으므로[6], 이런 부분들에서의 세심한 관심과 조절이 필요하다.

다. 특히 청소년에서 의미 있는 만성 코로나19증후군은 3개 이상의 장기에 해당하는 증상군으로 발생하는 경향이 있다고 알려져 있어[136, 138], 약물 요법 등 증재가 필요한 경우에는 다분야 전문가의 협진 체계를 활용한 효과적인 접근이 필요하다.

### 핵심질문 12) 코로나19 백신접종이 만성 코로나19증후군 발생에 영향을 미치는가?

#### 권고안

- 코로나19 백신접종이 코로나19에 걸린 후 만성 코로나19증후군 발생을 증가시킨다는 근거는 없으므로 이를 염려하여 백신접종을 피할 필요는 없다.

코로나19 백신접종은 감염 후 만성 코로나19증후군 발생의 위험을 약 15% 감소시키는 것으로 보고된 바 있으며, 이스라엘에서 시행된 코로나19 감염 전 2회 백신접종을 받았던 환자들을 대상으로 한 백신접종 효과 분석 연구결과 코로나19 백신접종자가 미접종자 보다 만성 코로나19증후군 증상이 나타날 가능성이 낮은 것으로 확인된 바 있다[141]. 또한 영국에서 시행된 백신접종군과 사회·인구학적으로 유사한 미접종군 비교 연구에서도 만성 코로나19증후군 발생은 각각 9.5%, 14.6%로 백신접종군에서 발생률이 유의하게 낮은 것으로 확인되었다[20]. 그러나 아직까지 코로나19 백신접종이 만성 코로나19증후군 발생에 미치는 영향에 대한 확정적 근거가 부족하므로 추가 연구들이 더 필요하다.

## REFERENCES

1. World Health Organization (WHO). WHO coronavirus (COVID-19) dashboard. Available at: <https://covid19.who.int/>. Accessed 15 June 2022.
2. Soriano JB, Murthy S, Marshall JC, Relan P, Diaz JVWHO Clinical Case Definition Working Group on Post-COVID-19 Condition. A clinical case definition of post-COVID-19 condition by a Delphi consensus. *Lancet Infect Dis* 2022;22:e102-7.  
[PUBMED](#) | [CROSSREF](#)
3. National Institute for Health and Care Excellence (NICE). COVID-19 rapid guideline: managing the long-term effects of COVID-19. Available at: <https://www.nice.org.uk/guidance/ng188>. Accessed 15 June 2022.
4. Yelin D, Moschopoulos CD, Margalit I, Gkrania-Klotsas E, Landi F, Stahl JP, Yahav D. ESCMID rapid guidelines for assessment and management of long COVID. *Clin Microbiol Infect* 2022;28:955-72.  
[PUBMED](#) | [CROSSREF](#)
5. National Institutes of Health (NIH). NIH launches new initiative to study “Long COVID”. Available at: <https://covid19.nih.gov/covid-19-topics/long-covid>. Accessed 13 June 2022.
6. Davis HE, Assaf GS, McCorkell L, Wei H, Low RJ, Re'em Y, Redfield S, Austin JP, Akrami A. Characterizing long COVID in an international cohort: 7 months of symptoms and their impact. *EClinicalMedicine* 2021;38:101019.  
[PUBMED](#) | [CROSSREF](#)
7. Gorna R, MacDermott N, Rayner C, O'Hara M, Evans S, Agyen L, Nutland W, Rogers N, Hastie C. Long COVID guidelines need to reflect lived experience. *Lancet* 2021;397:455-7.  
[PUBMED](#) | [CROSSREF](#)
8. Office for National Statistics. Ayoubkhani D. Prevalence of ongoing symptoms following coronavirus (COVID-19) infection in the UK: 1 April 2021. Available at: <https://www.ons.gov.uk/peoplepopulationandcommunity/healthandsocialcare/conditionsanddiseases/bulletins/prevalenceofongoingsymptomsfollowingcoronaviruscovid19infectionintheuk/1april2021>. Accessed 13 June 2022.
9. Jennings G, Monaghan A, Xue F, Mockler D, Romero-Ortuño R. A systematic review of persistent symptoms and residual abnormal functioning following acute COVID-19: ongoing symptomatic phase *vs.* post-COVID-19 syndrome. *J Clin Med* 2021;10:5913.  
[PUBMED](#) | [CROSSREF](#)



10. Lacobucci G. Long covid: damage to multiple organs presents in young, low risk patients. *BMJ* 2020;371:m4470.  
[CROSSREF](#)
11. Ziauddeen N, Gurdasani D, O'Hara ME, Hastie C, Roderick P, Yao G, Alwan NA. Characteristics and impact of long Covid: findings from an online survey. *PLoS One* 2022;17:e0264331.  
[PUBMED](#) | [CROSSREF](#)
12. Kim Y, Kim SW, Chang HH, Kwon KT, Bae S, Hwang S. Significance and associated factors of long-term sequelae in patients after acute COVID-19 infection in Korea. *Infect Chemother* 2021;53:463-76.  
[PUBMED](#) | [CROSSREF](#)
13. Kim Y, Bitna-Ha , Kim SW, Chang HH, Kwon KT, Bae S, Hwang S. Post-acute COVID-19 syndrome in patients after 12 months from COVID-19 infection in Korea. *BMC Infect Dis* 2022;22:93.  
[PUBMED](#) | [CROSSREF](#)
14. Kim Y, Kim SW, Chang HH, Kwon KT, Hwang S, Bae S. One year follow-up of COVID-19 related symptoms and patient quality of life: a prospective cohort study. *Yonsei Med J* 2022;63:499-510.  
[PUBMED](#) | [CROSSREF](#)
15. Michelen M, Manoharan L, Elkheir N, Cheng V, Dagens A, Hastie C, O'Hara M, Suett J, Dahmash D, Bugaeva P, Rigby I, Munblit D, Harriss E, Burls A, Foote C, Scott J, Carson G, Olliaro P, Sigfrid L, Stavropoulou C. Characterising long COVID: a living systematic review. *BMJ Glob Health* 2021;6:e005427.  
[PUBMED](#) | [CROSSREF](#)
16. Cabrera Martimbianco AL, Pacheco RL, Bagattini ÂM, Riera R. Frequency, signs and symptoms, and criteria adopted for long COVID-19: a systematic review. *Int J Clin Pract* 2021;75:e14357.  
[PUBMED](#) | [CROSSREF](#)
17. Brodin P. Immune determinants of COVID-19 disease presentation and severity. *Nat Med* 2021;27:28-33.  
[PUBMED](#) | [CROSSREF](#)
18. Logue JK, Franko NM, McCulloch DJ, McDonald D, Magedson A, Wolf CR, Chu HY. Sequelae in adults at 6 months after COVID-19 infection. *JAMA Netw Open* 2021;4:e210830.  
[PUBMED](#) | [CROSSREF](#)
19. Lund LC, Hallas J, Nielsen H, Koch A, Mogensen SH, Brun NC, Christiansen CF, Thomsen RW, Pottegård A. Post-acute effects of SARS-CoV-2 infection in individuals not requiring hospital admission: a Danish population-based cohort study. *Lancet Infect Dis* 2021;21:1373-82.  
[PUBMED](#) | [CROSSREF](#)
20. Ayoubkhani D, Bosworth ML, King S, Pouwels KB, Glickman M, Nafilyan V, Zaccardi F, Khunti K, Alwan NA, Walker AS. Risk of long Covid in people infected with SARS-CoV-2 after two doses of a COVID-19 vaccine: community-based, matched cohort study. *medRxiv* 2022;2022.02.23.22271388.
21. Taquet M, Dercon Q, Luciano S, Geddes JR, Husain M, Harrison PJ. Incidence, co-occurrence, and evolution of long-COVID features: A 6-month retrospective cohort study of 273,618 survivors of COVID-19. *PLoS Med* 2021;18:e1003773.  
[PUBMED](#) | [CROSSREF](#)
22. Zhao YM, Shang YM, Song WB, Li QQ, Xie H, Xu QF, Jia JL, Li LM, Mao HL, Zhou XM, Luo H, Gao YF, Xu AG. Follow-up study of the pulmonary function and related physiological characteristics of COVID-19 survivors three months after recovery. *EclinicalMedicine* 2020;25:100463.  
[PUBMED](#) | [CROSSREF](#)
23. Frija-Masson J, Debray MP, Gilbert M, Lescure FX, Travert F, Borie R, Khalil A, Crestani B, d'Ortho MP, Bancal C. Functional characteristics of patients with SARS-CoV-2 pneumonia at 30 days post-infection. *Eur Respir J* 2020;56:2001754.  
[PUBMED](#) | [CROSSREF](#)
24. Mo X, Jian W, Su Z, Chen M, Peng H, Peng P, Lei C, Chen R, Zhong N, Li S. Abnormal pulmonary function in COVID-19 patients at time of hospital discharge. *Eur Respir J* 2020;55:2001217.  
[PUBMED](#) | [CROSSREF](#)
25. van den Borst B, Peters JB, Brink M, Schoon Y, Bleeker-Rovers CP, Schers H, van Hees HWH, van Helvoort H, van den Boogaard M, van der Hoeven H, Reijers MH, Prokop M, Vercoulen J, van den Heuvel M. Comprehensive health assessment 3 months after recovery from acute coronavirus disease 2019 (COVID-19). *Clin Infect Dis* 2021;73:e1089-98.  
[PUBMED](#) | [CROSSREF](#)
26. Bao C, Liu X, Zhang H, Li Y, Liu J. Coronavirus disease 2019 (COVID-19) CT findings: a systematic review and meta-analysis. *J Am Coll Radiol* 2020;17:701-9.  
[PUBMED](#) | [CROSSREF](#)
27. Zhu J, Zhong Z, Li H, Ji P, Pang J, Li B, Zhang J. CT imaging features of 4121 patients with COVID-19: a meta-analysis. *J Med Virol* 2020;92:891-902.  
[PUBMED](#) | [CROSSREF](#)

28. Ramos-Casals M, Brito-Zerón P, Mariette X. Systemic and organ-specific immune-related manifestations of COVID-19. *Nat Rev Rheumatol* 2021;17:315-32.  
[PUBMED](#) | [CROSSREF](#)
29. Patell R, Bogue T, Koshy A, Bindal P, Merrill M, Aird WC, Bauer KA, Zwicker JI. Postdischarge thrombosis and hemorrhage in patients with COVID-19. *Blood* 2020;136:1342-6.  
[PUBMED](#) | [CROSSREF](#)
30. Roberts LN, Whyte MB, Georgiou L, Giron G, Czuprynska J, Rea C, Vadher B, Patel RK, Gee E, Arya R. Postdischarge venous thromboembolism following hospital admission with COVID-19. *Blood* 2020;136:1347-50.  
[PUBMED](#) | [CROSSREF](#)
31. Wu C, Liu Y, Cai X, Zhang W, Li Y, Fu C. Prevalence of venous thromboembolism in critically ill patients with coronavirus disease 2019: a meta-analysis. *Front Med (Lausanne)* 2021;8:603558.  
[PUBMED](#) | [CROSSREF](#)
32. Puig-Domingo M, Marazuela M, Yildiz BO, Giustina A. COVID-19 and endocrine and metabolic diseases. An updated statement from the European Society of Endocrinology. *Endocrine* 2021;72:301-16.  
[PUBMED](#) | [CROSSREF](#)
33. Isidori AM, Arnaldi G, Boscaro M, Falorni A, Giordano C, Giordano R, Pivonello R, Pofi R, Hasenmajer V, Venneri MA, Sbardella E, Simeoli C, Scaroni C, Lenzi A. COVID-19 infection and glucocorticoids: update from the Italian Society of Endocrinology Expert Opinion on steroid replacement in adrenal insufficiency. *J Endocrinol Invest* 2020;43:1141-7.  
[PUBMED](#) | [CROSSREF](#)
34. Carosi G, Morelli V, Del Sindaco G, Serban AL, Cremaschi A, Frigerio S, Rodari G, Profka E, Indirli R, Mungari R, Resi V, Orsi E, Ferrante E, Dolci A, Giavoli C, Arosio M, Mantovani G. Adrenal insufficiency at the time of COVID-19: a retrospective study in patients referring to a tertiary center. *J Clin Endocrinol Metab* 2021;106:e1354-61.  
[CROSSREF](#)
35. Rubino F, Amiel SA, Zimmet P, Alberti G, Bornstein S, Eckel RH, Mingrone G, Boehm B, Cooper ME, Chai Z, Del Prato S, Ji L, Hopkins D, Herman WH, Khunti K, Mbanya JC, Renard E. New-onset diabetes in Covid-19. *N Engl J Med* 2020;383:789-90.  
[PUBMED](#) | [CROSSREF](#)
36. di Filippo L, Formenti AM, Doga M, Frara S, Rovere-Querini P, Bosi E, Carlucci M, Giustina A. Hypocalcemia is a distinctive biochemical feature of hospitalized COVID-19 patients. *Endocrine* 2021;71:9-13.  
[PUBMED](#) | [CROSSREF](#)
37. Hutchings N, Babalyan V, Baghdasaryan S, Qefoyan M, Sargsyants N, Aghajanova E, Martirosyan A, Harutyunyan R, Lesnyak O, Formenti AM, Giustina A, Bilezikian JP. Patients hospitalized with COVID-19 have low levels of 25-hydroxyvitamin D. *Endocrine* 2021;71:267-9.  
[PUBMED](#) | [CROSSREF](#)
38. Muller I, Cannavaro D, Dazzi D, Covelli D, Mantovani G, Muscatello A, Ferrante E, Orsi E, Resi V, Longari V, Cuzzocrea M, Bandera A, Lazzaroni E, Dolci A, Ceriotti F, Re TE, Gori A, Arosio M, Salvi M. SARS-CoV-2-related atypical thyroiditis. *Lancet Diabetes Endocrinol* 2020;8:739-41.  
[PUBMED](#) | [CROSSREF](#)
39. Brancatella A, Ricci D, Viola N, Sgrò D, Santini F, Latrofa F. Subacute thyroiditis after Sars-COV-2 infection. *J Clin Endocrinol Metab* 2020;105:dga276.  
[PUBMED](#) | [CROSSREF](#)
40. Taquet M, Geddes JR, Husain M, Luciano S, Harrison PJ. 6-month neurological and psychiatric outcomes in 236 379 survivors of COVID-19: a retrospective cohort study using electronic health records. *Lancet Psychiatry* 2021;8:416-27.  
[PUBMED](#) | [CROSSREF](#)
41. Liu YH, Chen Y, Wang QH, Wang LR, Jiang L, Yang Y, Chen X, Li Y, Cen Y, Xu C, Zhu J, Li W, Wang YR, Zhang LL, Liu J, Xu ZQ, Wang YJ. One-year trajectory of cognitive changes in older survivors of COVID-19 in Wuhan, China: a longitudinal cohort study. *JAMA Neurol* 2022;79:509-17.  
[PUBMED](#) | [CROSSREF](#)
42. Cicco S, Vacca A, Cittadini A, Marra AM. Long-term follow-up may be useful in coronavirus disease 2019 survivors to prevent chronic complications. *Infect Chemother* 2020;52:407-9.  
[PUBMED](#) | [CROSSREF](#)
43. Huang L, Yao Q, Gu X, Wang Q, Ren L, Wang Y, Hu P, Guo L, Liu M, Xu J, Zhang X, Qu Y, Fan Y, Li X, Li C, Yu T, Xia J, Wei M, Chen L, Li Y, Xiao F, Liu D, Wang J, Wang X, Cao B. 1-year outcomes in hospital survivors with COVID-19: a longitudinal cohort study. *Lancet* 2021;398:747-58.  
[PUBMED](#) | [CROSSREF](#)

44. Sivan M, Taylor S. NICE guideline on long covid. *BMJ* 2020;371:m4938.  
[PUBMED](#) | [CROSSREF](#)
45. Sisó-Almirall A, Brito-Zerón P, Conangla Ferrín L, Kostov B, Moragas Moreno A, Mestres J, Sellarès J, Galindo G, Morera R, Basora J, Trilla A, Ramos-Casals M On Behalf Of The CAMFiC Long Covid-Study Group. Long Covid-19: proposed primary care clinical guidelines for diagnosis and disease management. *Int J Environ Res Public Health* 2021;18:4350.  
[PUBMED](#) | [CROSSREF](#)
46. Qin W, Chen S, Zhang Y, Dong F, Zhang Z, Hu B, Zhu Z, Li F, Wang X, Wang Y, Zhen K, Wang J, Wan Y, Li H, Elalamy I, Li C, Zhai Z, Wang C. Diffusion capacity abnormalities for carbon monoxide in patients with COVID-19 at 3-month follow-up. *Eur Respir J* 2021;58:2003677.  
[PUBMED](#) | [CROSSREF](#)
47. Huang C, Huang L, Wang Y, Li X, Ren L, Gu X, Kang L, Guo L, Liu M, Zhou X, Luo J, Huang Z, Tu S, Zhao Y, Chen L, Xu D, Li Y, Li C, Peng L, Li Y, Xie W, Cui D, Shang L, Fan G, Xu J, Wang G, Wang Y, Zhong J, Wang C, Wang J, Zhang D, Cao B. 6-month consequences of COVID-19 in patients discharged from hospital: a cohort study. *Lancet* 2021;397:220-32.  
[PUBMED](#) | [CROSSREF](#)
48. Mallia P, Meghji J, Wong B, Kumar K, Pilkington V, Chhabra S, Russell B, Chen J, Srikanthan K, Park M, Owles H, Liew F, Alcada J, Martin L, Coleman M, Elkin S, Ross C, Agrawal S, Gardiner T, Bell A, White A, Hampson D, Vithlani G, Manalan K, Bramer S, Martin Segura A, Kucheria A, Ratnakumar P, Sheeka A, Anandan L, Copley S, Russell G, Bloom CI, Kon OM. Symptomatic, biochemical and radiographic recovery in patients with COVID-19. *BMJ Open Respir Res* 2021;8:e000908.  
[PUBMED](#) | [CROSSREF](#)
49. D'Cruz RF, Waller MD, Perrin F, Periselneris J, Norton S, Smith LJ, Patrick T, Walder D, Heitmann A, Lee K, Madula R, McNulty W, Macedo P, Lyall R, Warwick G, Galloway JB, Birring SS, Patel A, Patel I, Jolley CJ. Chest radiography is a poor predictor of respiratory symptoms and functional impairment in survivors of severe COVID-19 pneumonia. *ERJ Open Res* 2021;7:00655-02020.  
[PUBMED](#) | [CROSSREF](#)
50. Arnold DT, Hamilton FW, Milne A, Morley AJ, Viner J, Attwood M, Noel A, Gunning S, Hatrick J, Hamilton S, Elvers KT, Hyams C, Bibby A, Moran E, Adamali HI, Dodd JW, Maskell NA, Barratt SL. Patient outcomes after hospitalisation with COVID-19 and implications for follow-up: results from a prospective UK cohort. *Thorax* 2021;76:399-401.  
[PUBMED](#) | [CROSSREF](#)
51. Froidure A, Mahsouli A, Liistro G, De Greef J, Belkhir L, Gérard L, Bertrand A, Koenig S, Pothén L, Yildiz H, Mwenge B, Aboubakar F, Gohy S, Pilette C, Reyckler G, Coche E, Yombi JC, Ghaye B. Integrative respiratory follow-up of severe COVID-19 reveals common functional and lung imaging sequelae. *Respir Med* 2021;181:106383.  
[PUBMED](#) | [CROSSREF](#)
52. Sanchez-Ramirez DC, Normand K, Zhaoyun Y, Torres-Castro R. Long-term impact of COVID-19: a systematic review of the literature and meta-analysis. *Biomedicine* 2021;9:900.  
[PUBMED](#) | [CROSSREF](#)
53. Raman B, Cassar MP, Tunnicliffe EM, Filippini N, Griffanti L, Alfaro-Almagro F, Okell T, Sheerin F, Xie C, Mahmood M, Mózes FE, Lewandowski AJ, Ohuma EO, Holdsworth D, Lamlum H, Woodman MJ, Krasopoulos C, Mills R, McConnell FAK, Wang C, Arthofer C, Lange FJ, Andersson J, Jenkinson M, Antoniadou C, Channon KM, Shanmuganathan M, Ferreira VM, Piechnik SK, Klenerman P, Brightling C, Talbot NP, Petousi N, Rahman NM, Ho LP, Saunders K, Geddes JR, Harrison PJ, Pattinson K, Rowland MJ, Angus BJ, Gleeson F, Pavlides M, Koychev I, Miller KL, Mackay C, Jezzard P, Smith SM, Neubauer S. Medium-term effects of SARS-CoV-2 infection on multiple vital organs, exercise capacity, cognition, quality of life and mental health, post-hospital discharge. *EClinicalMedicine* 2021;31:100683.  
[PUBMED](#) | [CROSSREF](#)
54. Song WJ, Hui CKM, Hull JH, Birring SS, McGarvey L, Mazzone SB, Chung KF. Confronting COVID-19-associated cough and the post-COVID syndrome: role of viral neurotropism, neuroinflammation, and neuroimmune responses. *Lancet Respir Med* 2021;9:533-44.  
[PUBMED](#) | [CROSSREF](#)
55. Lewek J, Jatczak-Pawlik I, Maciejewski M, Jankowski P, Banach M. COVID-19 and cardiovascular complications - preliminary results of the LATE-COVID study. *Arch Med Sci* 2021;17:818-22.  
[PUBMED](#) | [CROSSREF](#)
56. Tudoran C, Tudoran M, Pop GN, Giurgi-Oncu C, Cut TG, Lazureanu VE, Oancea C, Parv F, Ciocarlie T, Bende F. Associations between the severity of the post-acute COVID-19 syndrome and echocardiographic abnormalities in previously healthy outpatients following infection with SARS-CoV-2. *Biology (Basel)* 2021;10:469.  
[PUBMED](#) | [CROSSREF](#)

57. Hayama H, Ide S, Moroi M, Kitami Y, Bekki N, Kubota S, Uemura Y, Hara H, Kutsuna S, Ohmagari N, Hiroi Y. Elevated high-sensitivity troponin is associated with subclinical cardiac dysfunction in patients recovered from coronavirus disease 2019. *Glob Health Med* 2021;3:95-101.  
[PUBMED](#) | [CROSSREF](#)
58. Sonnweber T, Sahanic S, Pizzini A, Luger A, Schwabl C, Sonnweber B, Kurz K, Koppelstätter S, Haschka D, Petzer V, Boehm A, Aichner M, Tymoszyk P, Lener D, Theurl M, Lorscheid-Köhler A, Tancevski A, Schapfl A, Schaber M, Hilbe R, Nairz M, Puchner B, Hüttenberger D, Tschurtschenthaler C, Alshoff M, Peer A, Hartig F, Bellmann R, Joannidis M, Gollmann-Tepeköylü C, Holfeld J, Feuchtnner G, Egger A, Hoermann G, Schroll A, Fritsche G, Wildner S, Bellmann-Weiler R, Kirchmair R, Helbok R, Prosch H, Rieder D, Trajanoski Z, Kronenberg F, Wöll E, Weiss G, Widmann G, Löffler-Ragg J, Tancevski I. Cardiopulmonary recovery after COVID-19: an observational prospective multicentre trial. *Eur Respir J* 2021;57:2003481.  
[PUBMED](#) | [CROSSREF](#)
59. Malek LA, Marczak M, Milosz-Wieczorek B, Konopka M, Braksator W, Drygas W, Krzywański J. Cardiac involvement in consecutive elite athletes recovered from Covid-19: a magnetic resonance study. *J Magn Reson Imaging* 2021;53:1723-9.  
[PUBMED](#) | [CROSSREF](#)
60. Pan C, Zhang Z, Luo L, Wu W, Jia T, Lu L, Liu W, Qin Y, Hu F, Ding X, Qin P, Qian L, Chen J, Li S. Cardiac T1 and T2 mapping showed myocardial involvement in recovered COVID-19 patients initially considered devoid of cardiac damage. *J Magn Reson Imaging* 2021;54:421-8.  
[PUBMED](#) | [CROSSREF](#)
61. Joy G, Artico J, Kurdi H, Seraphim A, Lau C, Thornton GD, Oliveira MF, Adam RD, Azimonia N, Menacho K, Chacko L, Brown JT, Patel RK, Shiwani H, Bhuva A, Augusto JB, Andiapan M, McKnight A, Noursadeghi M, Pierce I, Evain T, Captur G, Davies RH, Greenwood JP, Fontana M, Kellman P, Schelbert EB, Treibel TA, Manisty C, Moon JCCOVIDsortium investigators. Prospective case-control study of cardiovascular abnormalities 6 months following mild COVID-19 in healthcare workers. *JACC Cardiovasc Imaging* 2021;14:2155-66.  
[PUBMED](#) | [CROSSREF](#)
62. Tenforde MW, Kim SS, Lindsell CJ, Billig Rose E, Shapiro NI, Files DC, Gibbs KW, Erickson HL, Steingrub JS, Smithline HA, Gong MN, Aboodi MS, Exline MC, Henning DJ, Wilson JG, Khan A, Qadir N, Brown SM, Peltan ID, Rice TW, Hager DN, Ginde AA, Stubblefield WB, Patel MM, Self WH, Feldstein LRIIVY Network InvestigatorsCDC COVID-19 Response TeamIVY Network Investigators. Symptom duration and risk factors for delayed return to usual health among outpatients with COVID-19 in a multistate health care systems network - United States, March-June 2020. *MMWR Morb Mortal Wkly Rep* 2020;69:993-8.  
[PUBMED](#) | [CROSSREF](#)
63. Daher A, Balfanz P, Cornelissen C, Müller A, Bergs I, Marx N, Müller-Wieland D, Hartmann B, Dreher M, Müller T. Follow up of patients with severe coronavirus disease 2019 (COVID-19): Pulmonary and extrapulmonary disease sequelae. *Respir Med* 2020;174:106197.  
[PUBMED](#) | [CROSSREF](#)
64. Rosales-Castillo A, García de Los Ríos C, Mediavilla García JD. Persistent symptoms after acute COVID-19 infection: importance of follow-up. *Med Clin (Engl Ed)* 2021;156:35-6.  
[CROSSREF](#)
65. Carfi A, Bernabei R, Landi FGemelli Against COVID-19 Post-Acute Care Study Group. Gemelli against COVID-19 post-acute care study group. Persistent symptoms in patients after acute COVID-19. *JAMA* 2020;324:603-5.  
[PUBMED](#) | [CROSSREF](#)
66. Mandal S, Barnett J, Brill SE, Brown JS, Denny EK, Hare SS, Heightman M, Hillman TE, Jacob J, Jarvis HC, Lipman MCI, Naidu SB, Nair A, Porter JC, Tomlinson GS, Hurst JRARC Study Group. 'Long-COVID': a cross-sectional study of persisting symptoms, biomarker and imaging abnormalities following hospitalisation for COVID-19. *Thorax* 2021;76:396-8.  
[PUBMED](#) | [CROSSREF](#)
67. Garrigues E, Janvier P, Kherabi Y, Le Bot A, Hamon A, Gouze H, Doucet L, Berkani S, Oliosi E, Mallart E, Corre F, Zarrouk V, Moyer JD, Galy A, Honsel V, Fantin B, Nguyen Y. Post-discharge persistent symptoms and health-related quality of life after hospitalization for COVID-19. *J Infect* 2020;81:e4-6.  
[PUBMED](#) | [CROSSREF](#)
68. Rimmer A. Covid-19: impact of long term symptoms will be profound, warns BMA. *BMJ* 2020;370:m3218.  
[PUBMED](#) | [CROSSREF](#)
69. Greenhalgh T, Knight M, A'Court C, Buxton M, Husain L. Management of post-acute covid-19 in primary care. *BMJ* 2020;370:m3026.  
[PUBMED](#) | [CROSSREF](#)

70. Chung KI, Song CH. Clinical usefulness of fatigue severity scale for patients with fatigue, and anxiety or depression. *Korean J Psychosom Med* 2001;9:164-73.
71. Townsend L, Dyer AH, Jones K, Dunne J, Mooney A, Gaffney F, O'Connor L, Leavy D, O'Brien K, Dowds J, Sugrue JA, Hopkins D, Martin-Loeches I, Ni Cheallaigh C, Nadarajan P, McLaughlin AM, Bourke NM, Bergin C, O'Farrelly C, Bannan C, Conlon N. Persistent fatigue following SARS-CoV-2 infection is common and independent of severity of initial infection. *PLoS One* 2020;15:e0240784.  
[PUBMED](#) | [CROSSREF](#)
72. Alrubaye R, Choudhury H. Severe Rhabdomyolysis in a 35-year-old woman with COVID-19 due to SARS-CoV-2 infection: a case report. *Am J Case Rep* 2020;21:e926733.  
[PUBMED](#) | [CROSSREF](#)
73. Chan KH, Farouji I, Abu Hanoud A, Slim J. Weakness and elevated creatinine kinase as the initial presentation of coronavirus disease 2019 (COVID-19). *Am J Emerg Med* 2020;38:1548.e1-3.  
[PUBMED](#) | [CROSSREF](#)
74. Husain R, Corcuera-Solano I, Dayan E, Jacobi AH, Huang M. Rhabdomyolysis as a manifestation of a severe case of COVID-19: a case report. *Radiol Case Rep* 2020;15:1633-7.  
[PUBMED](#) | [CROSSREF](#)
75. Khosla SG, Nysten ES, Khosla R. Rhabdomyolysis in patients hospitalized with COVID-19 infection: five case series. *J Investig Med High Impact Case Rep* 2020;8:2324709620984603.  
[PUBMED](#) | [CROSSREF](#)
76. Sneller MC, Liang CJ, Marques AR, Chung JY, Shanbhag SM, Fontana JR, Raza H, Okeke O, Dewar RL, Higgins BP, Tolstenko K, Kwan RW, Gittens KR, Seamon CA, McCormack G, Shaw JS, Okpali GM, Law M, Trihemasa K, Kennedy BD, Shi V, Justement JS, Buckner CM, Blazkova J, Moir S, Chun TW, Lane HC. A longitudinal study of COVID-19 sequelae and immunity: baseline findings. *Ann Intern Med* 2022;175:969-79.  
[PUBMED](#) | [CROSSREF](#)
77. Dos Santos PK, Sigoli E, Bragança LJG, Cornachione AS. The musculoskeletal involvement after mild to moderate COVID-19 infection. *Front Physiol* 2022;13:813924.  
[PUBMED](#) | [CROSSREF](#)
78. Martelletti P, Bentivegna E, Spuntarelli V, Luciani M. Long-COVID headache. *SN Compr Clin Med* 2021;3:1704-6.  
[PUBMED](#) | [CROSSREF](#)
79. Premraj L, Kannapadi NV, Briggs J, Seal SM, Battaglini D, Fanning J, Suen J, Robba C, Fraser J, Cho SM. Mid and long-term neurological and neuropsychiatric manifestations of post-COVID-19 syndrome: a meta-analysis. *J Neurol Sci* 2022;434:120162.  
[PUBMED](#) | [CROSSREF](#)
80. Bolay H, Gül A, Baykan B. COVID-19 is a real headache! *Headache* 2020;60:1415-21.  
[PUBMED](#) | [CROSSREF](#)
81. Diaz-Mitoma F, Vanast WJ, Tyrrell DL. Increased frequency of Epstein-Barr virus excretion in patients with new daily persistent headaches. *Lancet* 1987;1:411-5.  
[PUBMED](#) | [CROSSREF](#)
82. Rozen TD. Daily persistent headache after a viral illness during a worldwide pandemic may not be a new occurrence: Lessons from the 1890 Russian/Asiatic flu. *Cephalalgia* 2020;40:1406-9.  
[PUBMED](#) | [CROSSREF](#)
83. Nurek M, Rayner C, Freyer A, Taylor S, Järte L, MacDermott N, Delaney BCDelphi panellists. Recommendations for the recognition, diagnosis, and management of long COVID: a Delphi study. *Br J Gen Pract* 2021;71:e815-25.  
[PUBMED](#) | [CROSSREF](#)
84. Douaud G, Lee S, Alfaro-Almagro F, Arthofer C, Wang C, McCarthy P, Lange F, Andersson JLR, Griffanti L, Duff E, Jbabdi S, Taschler B, Keating P, Winkler AM, Collins R, Matthews PM, Allen N, Miller KL, Nichols TE, Smith SM. SARS-CoV-2 is associated with changes in brain structure in UK Biobank. *Nature* 2022;604:697-707.  
[PUBMED](#) | [CROSSREF](#)
85. Guedj E, Champion JY, Dudouet P, Kaphan E, Bregeon F, Tissot-Dupont H, Guis S, Barthelemy F, Habert P, Ceccaldi M, Million M, Raoult D, Camilleri S, Eldin C. <sup>18</sup>F-FDG brain PET hypometabolism in patients with long COVID. *Eur J Nucl Med Mol Imaging* 2021;48:2823-33.  
[PUBMED](#) | [CROSSREF](#)
86. Becker JH, Lin JJ, Doernberg M, Stone K, Navis A, Festa JR, Wisnivesky JP. Assessment of cognitive function in patients after COVID-19 infection. *JAMA Netw Open* 2021;4:e2130645.  
[PUBMED](#) | [CROSSREF](#)

87. British Thoracic Society. British Thoracic Society guidance on respiratory follow up of patients with a clinico-radiological diagnosis of COVID-19 pneumonia. Available at: <https://www.brit-thoracic.org.uk/covid-19/covid-19-information-for-the-respiratory-community/>. Accessed 5 June 2022.
88. NHS England. National commissioning guidance for post COVID services. Available at: <https://allcatsrgrey.org.uk/wp/download/commissioning/C1248-national-guidance-post-covid-syndrome-assessment-clinics-v2.pdf>. Accessed 15 June 2022.
89. Bonazza F, Borghi L, di San Marco EC, Piscopo K, Bai F, Monforte AD, Vegni E. Psychological outcomes after hospitalization for COVID-19: data from a multidisciplinary follow-up screening program for recovered patients. *Res Psychother* 2021;23:491.  
[PUBMED](#) | [CROSSREF](#)
90. Dong F, Liu HL, Dai N, Yang M, Liu JP. A living systematic review of the psychological problems in people suffering from COVID-19. *J Affect Disord* 2021;292:172-88.  
[PUBMED](#) | [CROSSREF](#)
91. World Health Organization (WHO). Living guidance for clinical management of COVID-19. Available at: <https://www.who.int/publications/i/item/WHO-2019-nCoV-clinical-2021-2>. Accessed 10 June 2022.
92. Li L, Li F, Fortunati F, Krystal JH. Association of a prior psychiatric diagnosis with mortality among hospitalized patients with coronavirus disease 2019 (COVID-19) infection. *JAMA Netw Open* 2020;3:e2023282.  
[PUBMED](#) | [CROSSREF](#)
93. Bourne RS, Mills GH. Sleep disruption in critically ill patients--pharmacological considerations. *Anaesthesia* 2004;59:374-84.  
[PUBMED](#) | [CROSSREF](#)
94. Hosey MM, Needham DM. Survivorship after COVID-19 ICU stay. *Nat Rev Dis Primers* 2020;6:60.  
[PUBMED](#) | [CROSSREF](#)
95. Guedj E, Campion JY, Horowitz T, Barthelemy F, Cammilleri S, Ceccaldi M. The impact of COVID-19 lockdown on brain metabolism. *Hum Brain Mapp* 2022;43:593-7.  
[PUBMED](#) | [CROSSREF](#)
96. National Institutes of Health (NIH). COVID-19 treatment guidelines panel. Coronavirus disease 2019 (COVID-19) treatment guidelines. Available at: <https://www.covid19treatmentguidelines.nih.gov/>. Accessed 10 June 2022.
97. Ramacciotti E, Barile Agati L, Calderaro D, Aguiar VCR, Spyropoulos AC, de Oliveira CCC, Lins Dos Santos J, Volpiani GG, Sobreira ML, Joviliano EE, Bohatch Júnior MS, da Fonseca BAL, Ribeiro MS, Dusilek C, Itinose K, Sanches SMV, de Almeida Araujo Ramos K, de Moraes NF, Tierno PFGMM, de Oliveira ALML, Tachibana A, Chate RC, Santos MVB, de Menezes Cavalcante BB, Moreira RCR, Chang C, Tafur A, Fareed J, Lopes RDMICHELLE investigators. Rivaroxaban versus no anticoagulation for post-discharge thromboprophylaxis after hospitalisation for COVID-19 (MICHELLE): an open-label, multicentre, randomised, controlled trial. *Lancet* 2022;399:50-9.  
[PUBMED](#) | [CROSSREF](#)
98. Reina-Gutiérrez S, Torres-Costoso A, Martínez-Vizcaíno V, Núñez de Arenas-Arroyo S, Fernández-Rodríguez R, Pozuelo-Carrascosa DP. Effectiveness of pulmonary rehabilitation in interstitial lung disease, including coronavirus diseases: a systematic review and meta-analysis. *Arch Phys Med Rehabil* 2021;102:1989-97.e3.  
[PUBMED](#) | [CROSSREF](#)
99. Liu K, Zhang W, Yang Y, Zhang J, Li Y, Chen Y. Respiratory rehabilitation in elderly patients with COVID-19: A randomized controlled study. *Complement Ther Clin Pract* 2020;39:101166.  
[PUBMED](#) | [CROSSREF](#)
100. Hermann M, Pekacka-Egli AM, Witassek F, Baumgaertner R, Schoendorf S, Spielmanns M. Feasibility and efficacy of cardiopulmonary rehabilitation after COVID-19. *Am J Phys Med Rehabil* 2020;99:865-9.  
[PUBMED](#) | [CROSSREF](#)
101. Udina C, Ars J, Morandi A, Vilaró J, Cáceres C, Inzitari M. Rehabilitation in adult post-COVID-19 patients in post-acute care with therapeutic exercise. *J Frailty Aging* 2021;10:297-300.  
[PUBMED](#) | [CROSSREF](#)
102. Hameed F, Palatulan E, Jaywant A, Said R, Lau C, Sood V, Layton A, Gellhorn A. Outcomes of a COVID-19 recovery program for patients hospitalized with SARS-CoV-2 infection in New York City: a prospective cohort study. *PM R* 2021;13:609-17.  
[PUBMED](#) | [CROSSREF](#)
103. National Rehabilitation Center. Rehabilitation guide for patients with COVID-19 related illness. Available at: [http://www.nrc.go.kr/portal/board/boardView.do?no=18152&menu\\_cd=09\\_01\\_00\\_01&board\\_id=NRC\\_NOTICE\\_BOARD&bn=qnaView&fno=40&pageIndex=1](http://www.nrc.go.kr/portal/board/boardView.do?no=18152&menu_cd=09_01_00_01&board_id=NRC_NOTICE_BOARD&bn=qnaView&fno=40&pageIndex=1). Accessed 20 June 2022.

104. Myall KJ, Mukherjee B, Castanheira AM, Lam JL, Benedetti G, Mak SM, Preston R, Thillai M, Dewar A, Molyneux PL, West AG. Persistent post-COVID-19 interstitial lung disease. An observational study of corticosteroid treatment. *Ann Am Thorac Soc* 2021;18:799-806.  
[PUBMED](#) | [CROSSREF](#)
105. Denny EK, Garthwaite HS, Heightman MJ, Porter JC. A role for steroids in COVID-19-associated pneumonitis at six-week follow-up? *Ann Am Thorac Soc* 2021;18:1082-3.  
[PUBMED](#) | [CROSSREF](#)
106. Glynne P, Tahmasebi N, Gant V, Gupta R. Long COVID following mild SARS-CoV-2 infection: characteristic T cell alterations and response to antihistamines. *J Investig Med* 2022;70:61-7.  
[PUBMED](#) | [CROSSREF](#)
107. Malaty J, Malaty IA. Smell and taste disorders in primary care. *Am Fam Physician* 2013;88:852-9.  
[PUBMED](#)
108. Xydakis MS, Albers MW, Holbrook EH, Lyon DM, Shih RY, Frasnelli JA, Pagenstecher A, Kupke A, Enquist LW, Perlman S. Post-viral effects of COVID-19 in the olfactory system and their implications. *Lancet Neurol* 2021;20:753-61.  
[PUBMED](#) | [CROSSREF](#)
109. Addison AB, Wong B, Ahmed T, Macchi A, Konstantinidis I, Huart C, Frasnelli J, Fjaeldstad AW, Ramakrishnan VR, Rombaux P, Whitcroft KL, Holbrook EH, Poletti SC, Hsieh JW, Landis BN, Boardman J, Welge-Lüssen A, Maru D, Hummel T, Philpott CM. Clinical Olfactory Working Group consensus statement on the treatment of postinfectious olfactory dysfunction. *J Allergy Clin Immunol* 2021;147:1704-19.  
[PUBMED](#) | [CROSSREF](#)
110. Abdelalim AA, Mohamady AA, Elsayed RA, Elawady MA, Ghallab AF. Corticosteroid nasal spray for recovery of smell sensation in COVID-19 patients: a randomized controlled trial. *Am J Otolaryngol* 2021;42:102884.  
[PUBMED](#) | [CROSSREF](#)
111. Damm M, Pikart LK, Reimann H, Burkert S, Göktas Ö, Haxel B, Frey S, Charalampakis I, Beule A, Renner B, Hummel T, Hüttenbrink KB. Olfactory training is helpful in postinfectious olfactory loss: a randomized, controlled, multicenter study. *Laryngoscope* 2014;124:826-31.  
[PUBMED](#) | [CROSSREF](#)
112. Hura N, Xie DX, Choby GW, Schlosser RJ, Orlov CP, Seal SM, Rowan NR. Treatment of post-viral olfactory dysfunction: an evidence-based review with recommendations. *Int Forum Allergy Rhinol* 2020;10:1065-86.  
[PUBMED](#) | [CROSSREF](#)
113. Kim DY, Ha JH, Lee JH, Kim HJ, Park DY. Comparing the effectiveness of olfactory training, according as type and preference of odorant. *J Rhinol* 2019;26:92-8.  
[CROSSREF](#)
114. Smith ME, Haney E, McDonagh M, Pappas M, Daeges M, Wasson N, Fu R, Nelson HD. Treatment of myalgic encephalomyelitis/chronic fatigue syndrome: a systematic review for a National Institutes of Health pathways to prevention workshop. *Ann Intern Med* 2015;162:841-50.  
[PUBMED](#) | [CROSSREF](#)
115. Fowler-Davis S, Platts K, Thelwell M, Woodward A, Harrop D. A mixed-methods systematic review of post-viral fatigue interventions: are there lessons for long Covid? *PLoS One* 2021;16:e0259533.  
[PUBMED](#) | [CROSSREF](#)
116. Membrilla JA, Caronna E, Trigo-López J, González-Martínez A, Layos-Romero A, Pozo-Rosich P, Guerrero-Peral Á, Gago-Veiga AB, Andrés-López A, de Terán JD. Persistent headache after COVID-19: Pathophysiology, clinic and treatment. *Neurology Perspectives* 2021;1:S31-6.  
[CROSSREF](#)
117. MaassenVanDenBrink A, de Vries T, Danser AHJ. Headache medication and the COVID-19 pandemic. *J Headache Pain* 2020;21:38.  
[CROSSREF](#)
118. Kim BS, Chung JM, Chung PW, Park KY, Ahn JY, Moon HS, Park HK, Bae DW, Seo JG, Sohn JH, Song TJ. Clinical practice guideline of pharmacologic treatment for migraine prevention in adults 2021: The committee of clinical practice guideline of the Korean Headache Society. *Korean J Headache* 2021;21:56-66.  
[CROSSREF](#)
119. Crook H, Raza S, Nowell J, Young M, Edison P. Long covid-mechanisms, risk factors, and management. *BMJ* 2021;374:n1648.  
[PUBMED](#) | [CROSSREF](#)
120. Mayo Clinic. Chemo brain. Available at: <https://www.mayoclinic.org/diseases-conditions/chemo-brain/diagnosis-treatment/drc-20351065>. Accessed 11 July 2022.

121. Theoharides TC, Cholevas C, Polyzoidis K, Politis A. Long-COVID syndrome-associated brain fog and chemofog: Luteolin to the rescue. *Biofactors* 2021;47:232-41.  
[PUBMED](#) | [CROSSREF](#)
122. Mazza MG, Zanardi R, Palladini M, Rovere-Querini P, Benedetti F. Rapid response to selective serotonin reuptake inhibitors in post-COVID depression. *Eur Neuropsychopharmacol* 2022;54:1-6.  
[PUBMED](#) | [CROSSREF](#)
123. Nobile B, Durand M, Olié E, Guillaume S, Molès JP, Haffen E, Courtet P. The anti-inflammatory effect of the tricyclic antidepressant clomipramine and its high penetration in the brain might be useful to prevent the psychiatric consequences of SARS-CoV-2 infection. *Front Pharmacol* 2021;12:615695.  
[PUBMED](#) | [CROSSREF](#)
124. Khani E, Entezari-Maleki T. Fluvoxamine and long COVID-19; a new role for sigma-1 receptor (S1R) agonists. *Mol Psychiatry* 2022; [Epub ahead of print].  
[PUBMED](#) | [CROSSREF](#)
125. Seo H, Kim H, Bae S, Park S, Chung H, Sung HS, Jung J, Kim MJ, Kim SH, Lee SO, Choi SH, Kim YS, Son KY, Chong YP. Fluvoxamine treatment of patients with symptomatic COVID-19 in a community treatment center: a preliminary result of randomized controlled trial. *Infect Chemother* 2022;54:102-13.  
[PUBMED](#) | [CROSSREF](#)
126. Sookaromdee P, Wiwanitkit V. Correspondence on fluvoxamine treatment of patients with symptomatic COVID-19. *Infect Chemother* 2022;54:369.  
[PUBMED](#) | [CROSSREF](#)
127. Hashimoto Y, Suzuki T, Hashimoto K. Old drug fluvoxamine, new hope for COVID-19. *Eur Arch Psychiatry Clin Neurosci* 2022;272:161-3.  
[PUBMED](#) | [CROSSREF](#)
128. Lionetto L, Olivieri M, Capi M, De Bernardini D, Fazio F, Petrucca A, Pomes LM, De Luca O, Gentile G, Casolla B, Curto M, Salerno G, Schillizzi S, Torre MS, Santino I, Rocco M, Marchetti P, Aceti A, Ricci A, Bonfini R, Nicoletti F, Simmaco M, Borro M. Increased kynurenine-to-tryptophan ratio in the serum of patients infected with SARS-CoV2: An observational cohort study. *Biochim Biophys Acta Mol Basis Dis* 2021;1867:166042.  
[PUBMED](#) | [CROSSREF](#)
129. Thomas T, Stefanoni D, Reisz JA, Nemkov T, Bertolone L, Francis RO, Hudson KE, Zimring JC, Hansen KC, Hod EA, Spitalnik SL, D'Alessandro A. COVID-19 infection alters kynurenine and fatty acid metabolism, correlating with IL-6 levels and renal status. *JCI Insight* 2020;5:e140327.  
[PUBMED](#) | [CROSSREF](#)
130. Eroğlu İ, Eroğlu BÇ, Güven GS. Altered tryptophan absorption and metabolism could underlie long-term symptoms in survivors of coronavirus disease 2019 (COVID-19). *Nutrition* 2021;90:111308.  
[PUBMED](#) | [CROSSREF](#)
131. Castanares-Zapatero D, Chalou P, Kohn L, Dauvrin M, Detollenaere J, Maertens de Noordhout C, Primus-de Jong C, Cleemput I, Van den Heede K. Pathophysiology and mechanism of long COVID: a comprehensive review. *Ann Med* 2022;54:1473-87.  
[PUBMED](#) | [CROSSREF](#)
132. Maamar M, Artime A, Pariente E, Fierro P, Ruiz Y, Gutiérrez S, Tobalina M, Díaz-Salazar S, Ramos C, Olmos JM, Hernández JL. Post-COVID-19 syndrome, low-grade inflammation and inflammatory markers: a cross-sectional study. *Curr Med Res Opin* 2022;38:901-9.  
[PUBMED](#) | [CROSSREF](#)
133. Agarwala SR, Vijayvargiya M, Pandey P. Avascular necrosis as a part of 'long COVID-19'. *BMJ Case Rep* 2021;14:e242101.  
[PUBMED](#) | [CROSSREF](#)
134. Bhanuprasad K, Manesh A, Devasagayam E, Varghese L, Cherian LM, Kurien R, Karthik R, Deodhar D, Vanjare H, Peter J, Michael JS, Thomas M, Samuel P, Varghese GM. Risk factors associated with the mucormycosis epidemic during the COVID-19 pandemic. *Int J Infect Dis* 2021;111:267-70.  
[PUBMED](#) | [CROSSREF](#)
135. Bossley CJ, Kavaliumaite E, Harman K, Cook J, Ruiz G, Gupta A. Post-acute COVID-19 outcomes in children requiring hospitalisation. *Sci Rep* 2022;12:8208.  
[PUBMED](#) | [CROSSREF](#)
136. Buonsenso D, Munblit D, Pazukhina E, Ricchiuto A, Sinatti D, Zona M, De Matteis A, D'Ilario F, Gentili C, Lanni R, Rongai T, Del Balzo P, Fonte MT, Valente M, Zampino G, De Rose C, Sigfrid L, Valentini PFIMP-Roma. FIMP-Roma. Post-COVID condition in adults and children living in the same household in Italy: a prospective cohort study using the ISARIC global follow-up protocol. *Front Pediatr* 2022;10:834875.  
[PUBMED](#) | [CROSSREF](#)



137. Kikkenborg Berg S, Dam Nielsen S, Nygaard U, Bundgaard H, Palm P, Rotvig C, Vinggaard Christensen A. Long COVID symptoms in SARS-CoV-2-positive adolescents and matched controls (LongCOVIDKidsDK): a national, cross-sectional study. *Lancet Child Adolesc Health* 2022;6:240-8.  
[PUBMED](#) | [CROSSREF](#)
138. Stephenson T, Pinto Pereira SM, Shafran R, de Stavola BL, Rojas N, McOwat K, Simmons R, Zavala M, O'Mahoney L, Chalder T, Crawley E, Ford TJ, Harnden A, Heyman I, Swann O, Whittaker ECLoCk Consortium. Physical and mental health 3 months after SARS-CoV-2 infection (long COVID) among adolescents in England (CLoCk): a national matched cohort study. *Lancet Child Adolesc Health* 2022;6:230-9.  
[PUBMED](#) | [CROSSREF](#)
139. Rimes KA, Goodman R, Hotopf M, Wessely S, Meltzer H, Chalder T. Incidence, prognosis, and risk factors for fatigue and chronic fatigue syndrome in adolescents: a prospective community study. *Pediatrics* 2007;119:e603-9.  
[PUBMED](#) | [CROSSREF](#)
140. Borch L, Holm M, Knudsen M, Ellermann-Eriksen S, Hagstroem S. Long COVID symptoms and duration in SARS-CoV-2 positive children - a nationwide cohort study. *Eur J Pediatr* 2022;181:1597-607.  
[PUBMED](#) | [CROSSREF](#)
141. Kuodi P, Gorelik Y, Zayyad H, Wertheim O, Wiegler KB, Abu Jabal K, Dror AA, Nazzal S, Glikman D, Edelstein M. Association between BNT162b2 vaccination and reported incidence of post-COVID-19 symptoms: cross-sectional study 2020-21, Israel. *NPJ Vaccines* 2022;7:101.  
[PUBMED](#) | [CROSSREF](#)
